# Supplementary material
Source: PubMed Central journal article supplement (PMC4857189)
Supplement: NIHMS763187-supplement-2.pdf [file NIHMS763187-supplement-2.pdf]

## **SUPPLEMENTAL METHODS**

### **Construction of stably-expressing *SPRIGHTLY* melanocytes**

Melanocytes were seeded in a six-well plate,  $5 \times 10^5$  cells per well. After 16-20 h, the culture medium was removed, and 0.5 ml of pre-warmed medium containing 8  $\mu\text{g/ml}$  polybrene (Sigma) was added. Next, 0.5 ml of lenti-*SPRIGHTLY* or lenti-control vector was added to each well and mixed gently. The cells were returned to the incubator for another 8 h and fresh growth medium added. After 3 to 4 days of culture, cells were examined under a fluorescence microscope to determine the transduction efficiency. Transgene-containing cells were selected with puromycin (1  $\mu\text{g/ml}$ ) and the medium changed every 4 to 5 days. After several passages in selecting medium, stable expression of *SPRIGHTLY* was confirmed by qRT-PCR. Engineered melanocytes were termed “*SPRIGHTLY*-EE” and the control cells “Vector Only”.

### **Real-time quantitative reverse transcription-PCR (qPCR)**

Quantitative PCR was carried out by using TaqMan mRNA assays or SYBR Green mRNA assays and a 7500 Real-Time PCR System (Applied Biosystems/Life Technologies) in accordance with the manufacturer's protocols.

### **Proteome array analysis**

The Proteome Profiler™ Array Human Apoptosis Array Kit and Human Angiogenesis Array Kit (R&D Systems, Minneapolis, MN) were used according to manufactures recommendation.

### **RNA-seq and data analysis**

The raw reads (csfasta files) and quality scores (qual files) were obtained using SOLiD v3.5 instrument software. All the reads were aligned to 1) genomic reference, 2) junction reference, and 3) filter reference by BioScope (v1.3) Whole Transcriptome Pipeline (Life Technologies,

Carlsbad, California). The junction reference library was generated based on the RefSeq transcripts. The filter reference was provided by LifeTech and contained polyA, polyC, polyG, polyT, ribosomal RNAs, tRNAs, LINE, SINE, LTR and satellite repeats, rRNA, scRNA and snRNAs, as well as adaptor, barcode, and primer sequences. The criteria used for defining the alignment were the minimum mapping quality greater than 10 and only primary alignments were considered. Reads mapped to filter reference were filtered out from the final alignment file.

The raw reads (fastq files) from Illumina HiSeq1500 were aligned to the reference genome using TopHat version 1.4.1 (Trapnell et al., 2009) with RefSeq annotations and the “—no-novel-juncs” option. Ambiguous reads that mapped to more than one region in the genome and reads with MAPQ score less than 10 were removed.

The UCSC human genome version 19 (hg19) and corresponding RefSeq annotations were used for reference and mRNA transcript quantification. The bed coordinates of the lncRNAs from the Dinger Lab were applied for lncRNA transcript quantification. Transcript quantification was performed using Partek Genomics Suite (version 6.4, Partek Inc, St. Louis MI), and the raw read counts and normalized read counts (RPKM: reads per kilobase per million mapped reads, Mortazavi et al., 2008) were obtained.

The raw count information for all the mRNA and lncRNA transcripts was first filtered. The transcripts which did not present read count in all the samples were filtered out from further analysis. The remaining transcripts were analyzed by the BioConductor DESeq package (<http://www.ncbi.nlm.nih.gov/pubmed/20979621>) to detect the differential expression between SPRIGHTLY Knock-down and wild-type control or SPRIGHTLY-EE and vector control. Transcripts with detected in at least one sample (RPKM>1), fold change over 2 and p-value less than 0.05 were considered as significant differential expression.

## **RNA-FISH analysis**

RNA FISH analysis was done according to Khaitan et al. (2011).

## **Invasion Assays**

Invasion assays were performed as per Khaitan et al. (2011). Cell migration was counted using Aperio software with data expressed as the percent (%) invasion through the membrane relative to migration through the control sample. All samples were performed in triplicate.

## **Colony Formation (Cell Transformation) Assay**

Colony formation was examined using the CytoSelect™ 96-well Cell Transformation Assay kit (Cell Biolabs, Inc. Cat# CBA-135-T). Briefly, Agar Matrix Solution was mixed with DMEM w/FBS to form a Base Agar Matrix Layer, then applied and allowed to solidify in individual wells of a 96-well plate. Cells were then acquired by trypsinization, quantitated, and resuspended at four dilutions in culture medium (equal to 20000, 15000, 10000, and 5000 cells per well) then mixed with Agar Matrix Solution and added to wells to solidify on top of the Base Agar Matrix Layer. Once solidified, culture media was then applied on top on the Cell Suspension/Agar Matrix Layer and the plate was incubated at 37°C/5% CO<sub>2</sub> for 7 days. Following incubation, the samples were dissolved using Matrix Solubilization Solution, mixed with MTT Solution and Detergent Solution, incubated for 4 hours in the dark at room temperature, and finally measured at 570 nm using a SpectraMax M5 96-well plate reader (Molecular Devices). All cell samples and concentrations were performed in triplicate, including a “No Cells” negative control.

## **Immunofluorescence with laser-scanning confocal microscopy**

SPRIGHTLY-EE and Melanocyte Vector only cells were grown on chamber slides for three to four days, and slides were then stained for 1 h at room temperature with primary antibodies

directed against human Ki-67 (Abcam) at 1:200 dilution or anti-DPPIV (Abcam) at 1:250 dilution. Cells were washed four to five times in PBS and incubated with Alexa Fluor 546-conjugated secondary antibody for 1 h at room temperature in the dark. Cell nuclei were stained with DAPI (4',6-diamidino-2-phenylindole) and washed twice in PBS. Cells were visualized by Nikon A1R VAAS Confocal Microscope.

### **Chromogenic labelling of cells**

SPRIGHTLY-EE and Melanocyte Vector only cells were attached to autoclaved positive charged slides. Slides were washed with TBS-T buffer, subsequently placed in 6.0 pH citrate buffer for heat induced epitope retrieval and this was performed using the Biocare Decloaker instrument. Slides were stained with Leica Novacastra antibodies NCL-L-Ki67-MM1 (dilution of 1:200), and RTU-MelanA (diluted 1:4) for .5 hour at room temperature. Slides were incubated with Ventana's OmniMap Ms for 16 minutes and Ventana's ChromoMap DAB kit was used manually for 8 minutes for chromogenic detection. Slides were counterstained with hematoxylin (diluted 1:30) for 1 minute at room temperature. Slides were dehydrated and coverslipped, then scanned using the Aperio ScanScope XT.

### **In vivo analysis in mice**

Five week-old female Fox Chase SCID® mice were purchased from Charles River. Melanocytes ( $5 \times 10^6$ /mouse) were injected subcutaneously into the mice, and tumor size was monitored for four weeks. Tumor volume was calculated as  $\text{volume} = \text{width} \times \text{width} \times \text{length}/2$ .

## **SUPPLEMENTAL REFERENCES**

Khaitan D, Dinger ME, Mazar J, Crawford J, Smith MA, Mattick JS, et al. The melanoma-upregulated long noncoding RNA SPRY4-IT1 modulates apoptosis and invasion. *Cancer Res* 2011;71:3852-62.

Mortazavi A, Williams BA, McCue K, Schaeffer L, Wold B. Mapping and quantifying mammalian transcriptomes by RNA-Seq. *Nat Meth* 2008;5:621-28.

Trapnell C, Pachter L, Salzberg SL. TopHat: discovering splice junctions with RNA-Seq. *Bioinformatics* 2009;25:1105-11.

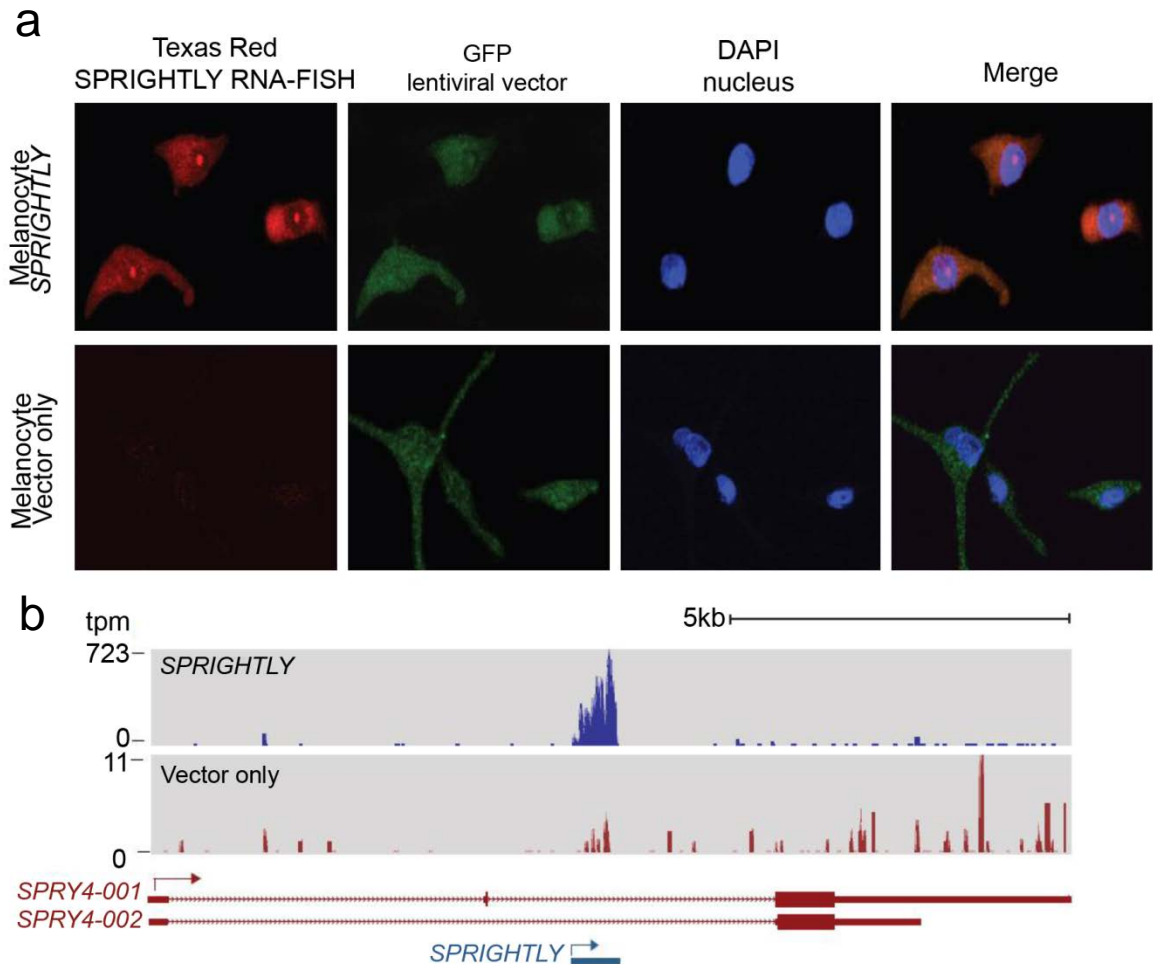

**Figure S1. Confirmation of the ectopic expression of *SPRIGHTLY* in melanocytes.** (a) RNA-FISH verification of the ectopic expression of *SPRIGHTLY* in *SPRIGHTLY*-EE melanocytes. *SPRIGHTLY* is stained red; nuclei are stained blue (DAPI), and lentiviral vector transfected cells are green (GFP). The orange color in the merge of *SPRIGHTLY*-EE cells indicates *SPRIGHTLY* expression in the cytoplasm. (b) Visualization of mapped sequencing tags from total RNA from *SPRIGHTLY*-EE and Vector Only cells confirming the ectopic expression of *SPRIGHTLY* in *SPRIGHTLY*-EE cells.

## SPRIGHTLY-EE cells: Melan-A staining

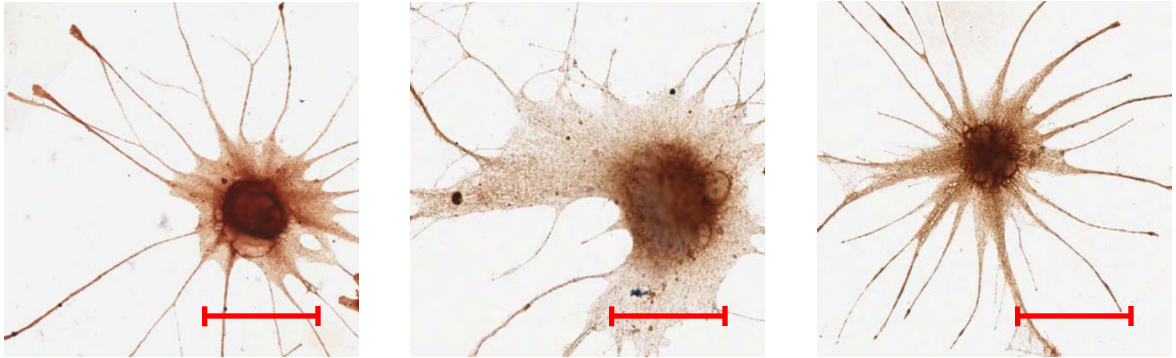

## Melanocyte VO cells: Melan-A staining

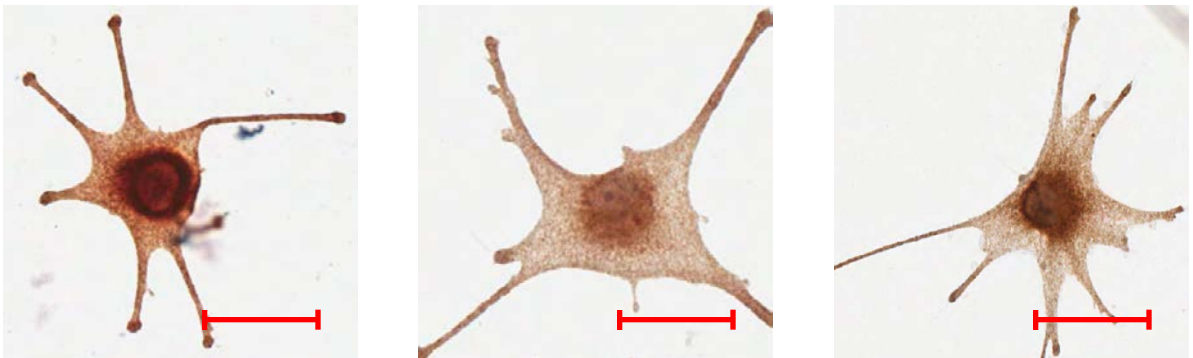

**Figure S2. MELAN A pigmentation staining.** Both SPRIGHTLY-EE and vector only parental cells were stained with MELAN A staining to detect changes in pigmentation. We did not observe any changes in the pigmentation. Scale bar = 10  $\mu$ m

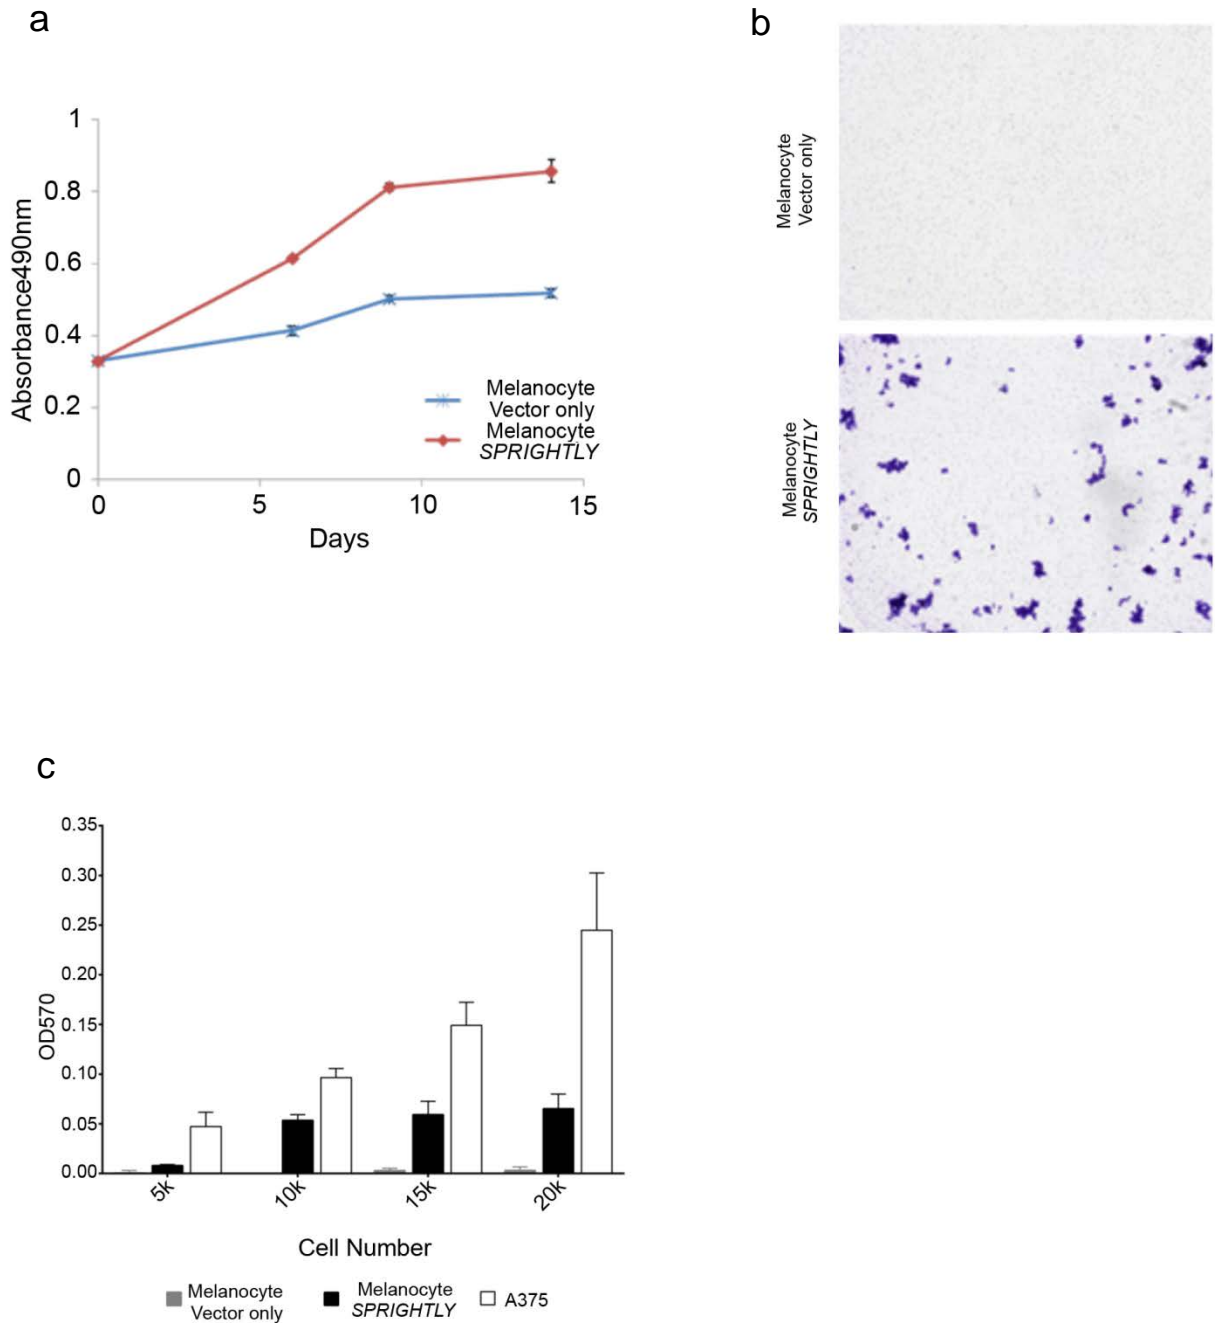

**Figure S3. *SPRIGHTLY*-EE cells show high growth rate, invasion and colony formation compared to Vector Only cells.** (a) *SPRIGHTLY* transfected melanocytes show a higher growth rate than melanocytes transfected with control vector. (b) Invasion assays show that ectopic expression of *SPRIGHTLY* in melanocytes leads to cellular transformation from non-invasive to invasive. (c) anchorage-independent colony formation is increased in *SPRIGHTLY*-EE cells compared to Melanocyte Vector only cells.



**Day 84 (12weeks)**

**Control**

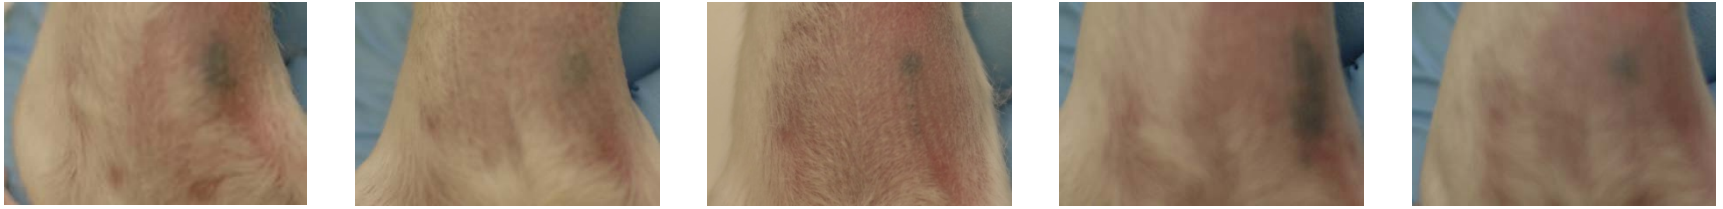

**SPRIGHTLY-EE**

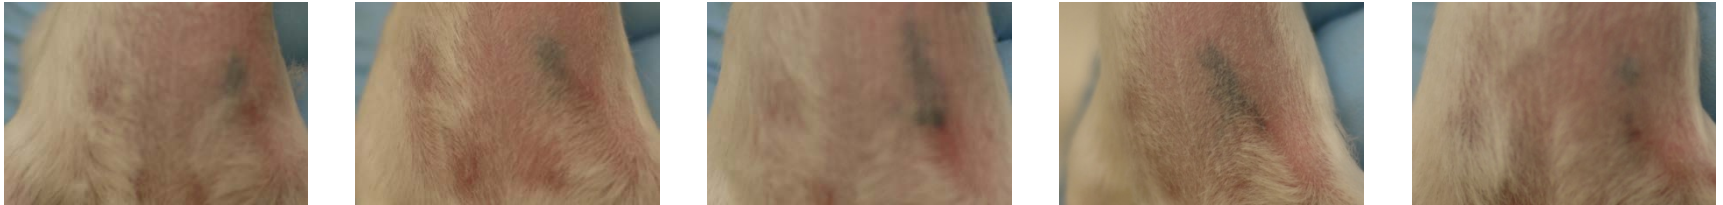

**Control**

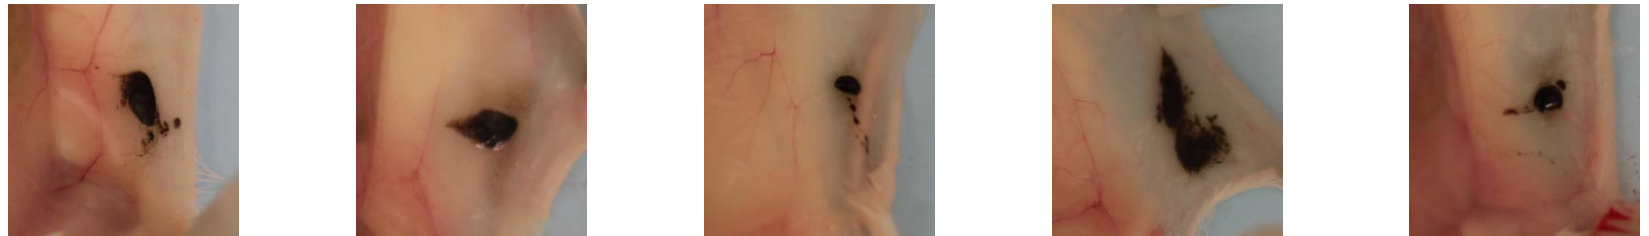

**SPRIGHTLY-EE**

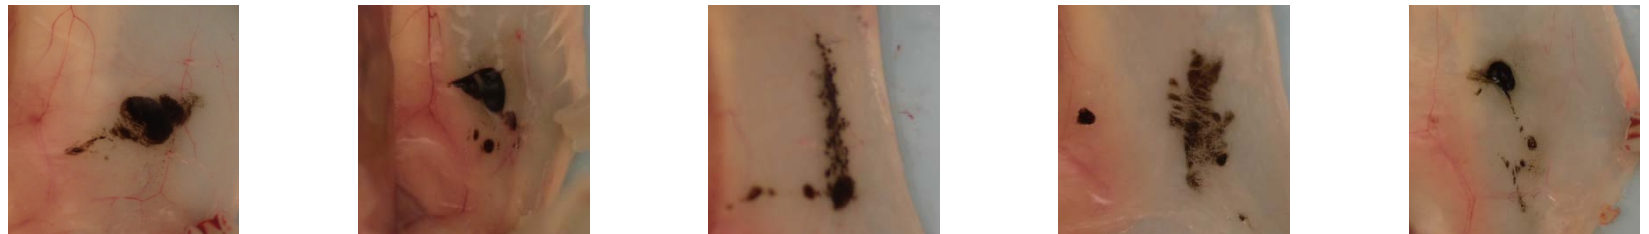

**Figure S4. SPRIGHTLY-EE and vector only parental cells grown in SCID mice**

Sub-cutaneous introduction of Melanocyte "Vector only" versus SPRIGHTLY-EE cells into the hind of SCID mice. Mice were monitored over the course of 12 weeks (84 days). Though no significant differences in tumor size were detected, several SPRIGHTLY-EE mice showed an unexpected migration of cells from the initial site of introduction, suggestive of invasive characteristics not seen in the parental line.

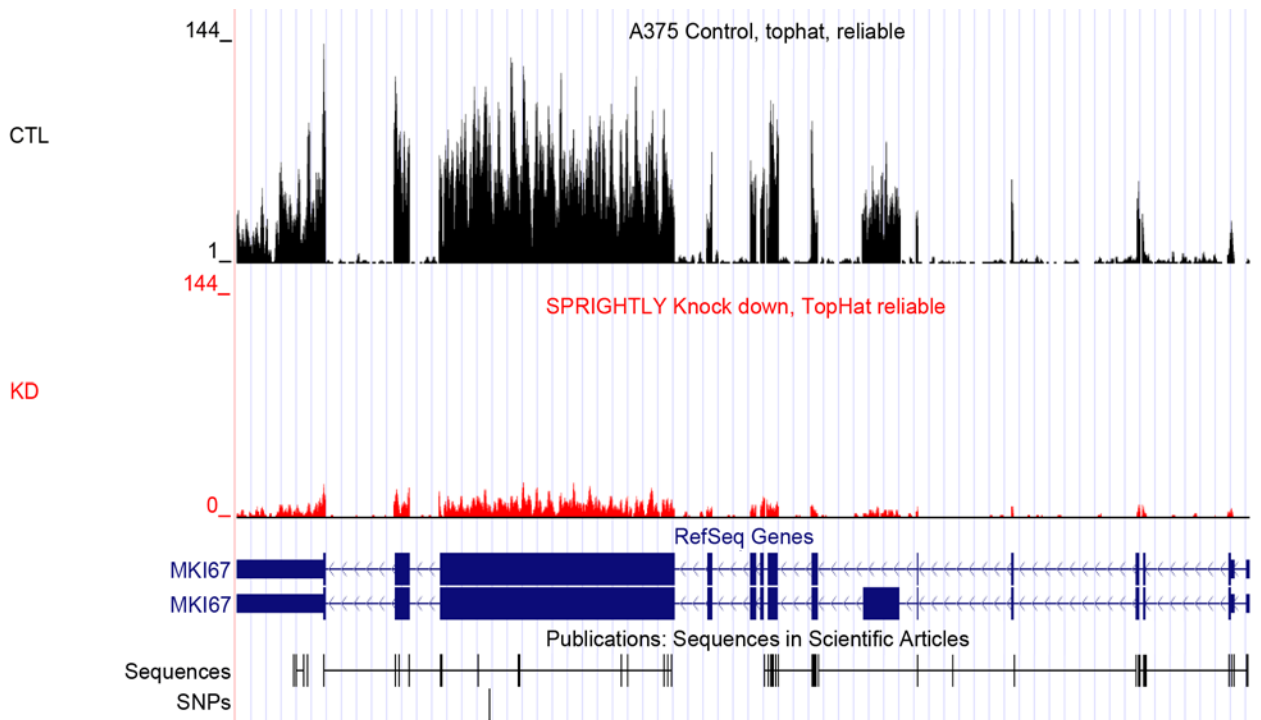

**Figure S5. *SPRIGHTLY* knockdown in melanoma cells (A375) downregulates *Ki67*.** *Ki67* is heavily downregulated in *SPRIGHTLY* knockdown cells. CTL – control and KD - *SPRIGHTLY* knockdown.

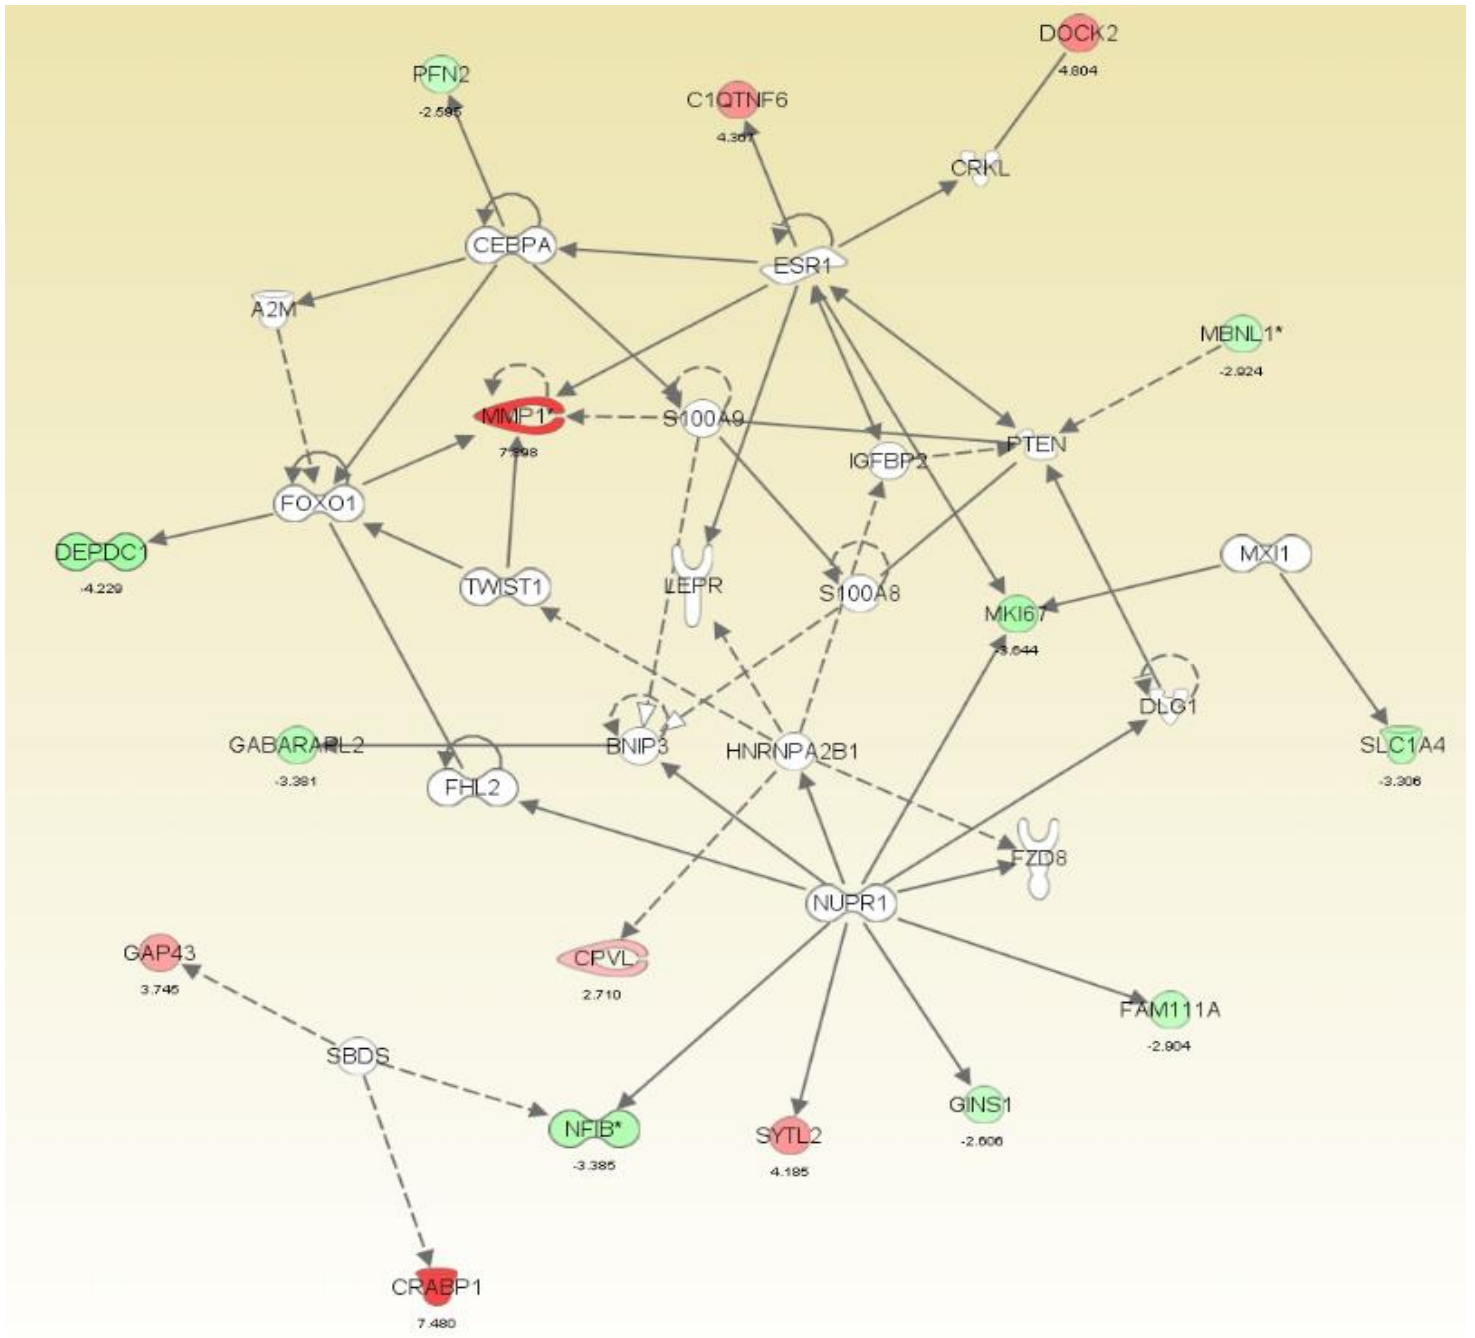

**Figure S6. SPRIGHTLY-mediated gene regulatory pathways.** Expanded network built from RNA-seq data. Downregulated and upregulated putative SPRIGHTLY target genes are indicated by green and red, respectively. MKi-67 is downregulated as reported in Figure 5a.

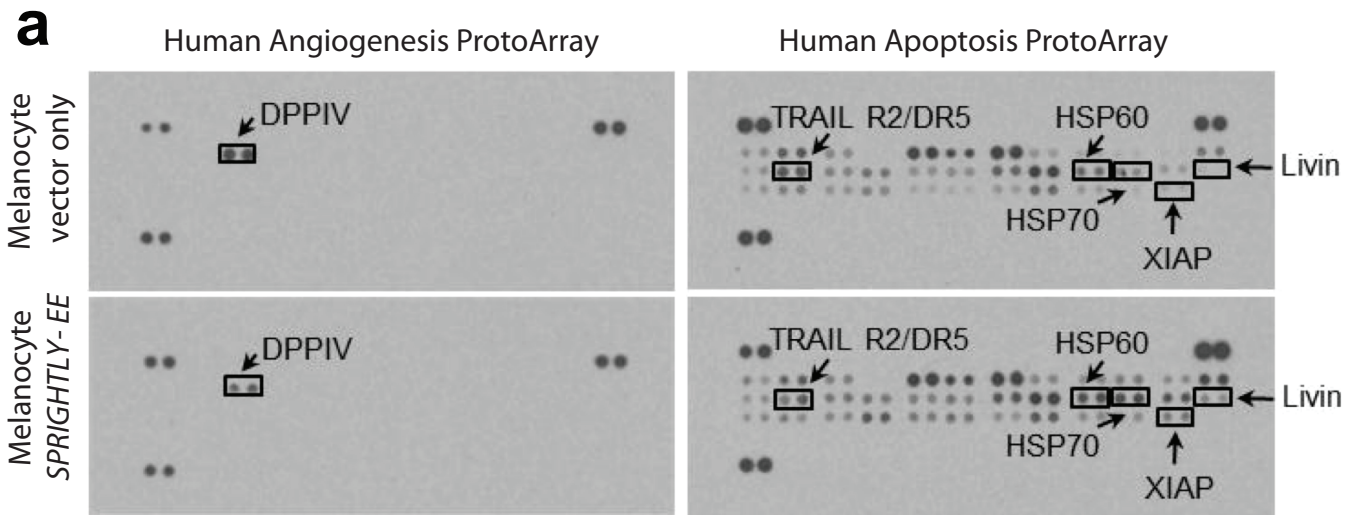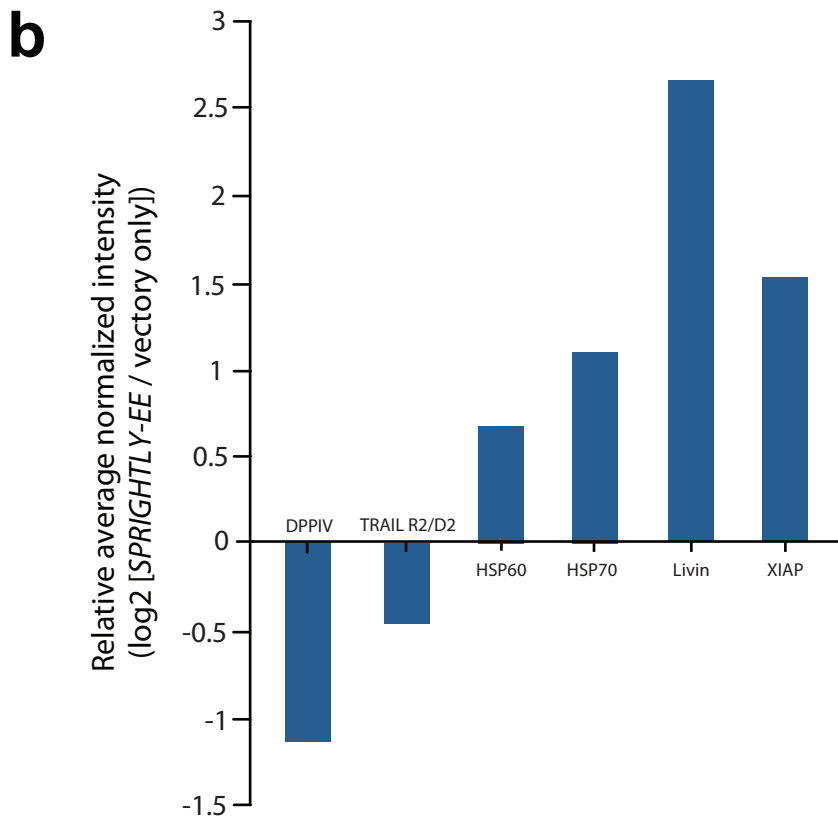

**Figure S7. Protein array analysis shows differentially expressed proteins in SPRIGHTLY expressing melanocytes compared to controls.** (a) Scanned western blot images of the angiogenesis and apoptosis protein array sets. (b) Quantified data of differentially expressed proteins detected in (a).

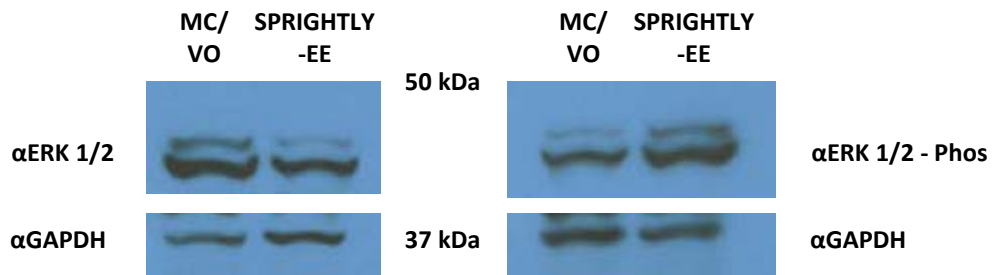

**Figure S8. ERK 1/2 Phosphorylation in SPRIGHTLY-EE cells**

Western blot analysis of ERK 1/2 vs ERK 1/2 –phosphate indicates an increase in phosphorylation in SPRIGHTLY-EE cells compared to Melanocyte “Vector only” cells. GAPDH was used as a load control.



**Dataset S1. RNA-Seq transcriptomic profiling of *SPRIGHTLY*-EE and Vector Only melanocytes.** A total of 740 genes were found to be significantly ( $p < 0.05$ ) differentially expressed.

| Transcript | Gene            | Strand | Transcript Length | <i>SPRIGHTLY</i> -EE (Reads) | Melanocyte Vector Only (Reads) | <i>SPRIGHTLY</i> -EE (RPKM) | Melanocyte Vector Only (RPKM) | <i>SPRIGHTLY</i> -EE/VO (RPKM) | p-value  | FDR      |
|------------|-----------------|--------|-------------------|------------------------------|--------------------------------|-----------------------------|-------------------------------|--------------------------------|----------|----------|
| AB019563   | AB019563        | +      | 294               | 5334                         | 17564                          | 783.61                      | 2,502.75                      | -3.19                          | 0.026903 | 1        |
| AB209021   | AB209021        | +      | 5267              | 63452                        | 19930                          | 520.35                      | 158.52                        | 3.28                           | 0.023154 | 1        |
| ACA47      | ACA47           | +      | 187               | 5176                         | 1349                           | 1,195.62                    | 302.21                        | 3.96                           | 0.013334 | 1        |
| AF052101   | AF052101        | -      | 1212              | 0                            | 108                            | 0.00                        | 3.73                          | -Inf                           | 0.017598 | 1        |
| AF056450   | AF056450        | -      | 160               | 78                           | 0                              | 20.92                       | 0.00                          | Inf                            | 0.048596 | 1        |
| AF071106   | AF071106        | +      | 285               | 157                          | 0                              | 23.76                       | 0.00                          | Inf                            | 0.002718 | 1        |
| AF085880   | AF085880        | +      | 600               | 0                            | 174                            | 0.01                        | 12.12                         | -902.80                        | 0.00184  | 1        |
| AF085983   | AF085983        | -      | 515               | 3                            | 120                            | 0.25                        | 9.76                          | -38.80                         | 0.047711 | 1        |
| AF116666   | AF116666        | -      | 1317              | 141                          | 4                              | 4.64                        | 0.14                          | 32.94                          | 0.03099  | 1        |
| AF218023   | AF218023        | +      | 2212              | 276                          | 21                             | 5.40                        | 0.40                          | 13.45                          | 0.018909 | 1        |
| AF304301   | AF304301        | +      | 260               | 231                          | 0                              | 38.33                       | 0.00                          | Inf                            | 0.000252 | 0.451157 |
| AF386504   | AF386504        | +      | 745               | 152                          | 7                              | 8.81                        | 0.38                          | 23.12                          | 0.041482 | 1        |
| AF400487   | AF400487        | +      | 4471              | 20                           | 266                            | 0.20                        | 2.49                          | -12.67                         | 0.023645 | 1        |
| AJ227892   | AJ227892        | +      | 742               | 103                          | 0                              | 6.00                        | 0.00                          | Inf                            | 0.018709 | 1        |
| AJ276888   | AJ276888        | +      | 364               | 97                           | 1                              | 11.51                       | 0.15                          | 75.85                          | 0.044244 | 1        |
| AJ420430   | AJ420430        | +      | 1195              | 138                          | 1                              | 4.98                        | 0.04                          | 122.19                         | 0.011632 | 1        |
| AK000749   | AK000749        | +      | 2110              | 188                          | 5                              | 3.84                        | 0.10                          | 38.27                          | 0.012123 | 1        |
| AK001099   | AK001099        | -      | 2371              | 0                            | 87                             | 0.00                        | 1.54                          | -Inf                           | 0.038064 | 1        |
| AK001150   | AK001150        | -      | 2089              | 55                           | 447                            | 1.14                        | 8.96                          | -7.88                          | 0.019861 | 1        |
| AK002085   | AK002085        | -      | 2308              | 0                            | 270                            | 0.01                        | 4.89                          | -929.23                        | 0.000102 | 0.284068 |
| AK021634   | AK021634        | -      | 3393              | 18                           | 233                            | 0.23                        | 2.88                          | -12.55                         | 0.033653 | 1        |
| AK021641   | AK021641        | -      | 2296              | 0                            | 81                             | 0.01                        | 1.48                          | -160.98                        | 0.047683 | 1        |
| AK022110   | AK022110        | +      | 1805              | 1                            | 191                            | 0.03                        | 4.44                          | -135.77                        | 0.002739 | 1        |
| AK022789   | AK022789        | -      | 2351              | 97                           | 1                              | 1.78                        | 0.02                          | 100.01                         | 0.044244 | 1        |
| AK022998   | AK022998        | +      | 2665              | 141                          | 4                              | 2.28                        | 0.07                          | 33.34                          | 0.03099  | 1        |
| AK024224   | AK024224        | -      | 1882              | 15                           | 331                            | 0.35                        | 7.38                          | -21.12                         | 0.004961 | 1        |
| AK024556   | <b>AK024556</b> | -      | 687               | 4357                         | 15                             | 273.94                      | 0.91                          | 299.48                         | 1.01E-13 | 6.16E-09 |
| AK025704   | AK025704        | +      | 2502              | 3                            | 169                            | 0.05                        | 2.83                          | -60.22                         | 0.012933 | 1        |
| AK025781   | AK025781        | -      | 2261              | 41                           | 305                            | 0.79                        | 5.64                          | -7.17                          | 0.04944  | 1        |
| AK026654   | AK026654        | +      | 2243              | 4                            | 141                            | 0.08                        | 2.63                          | -32.40                         | 0.034984 | 1        |
| AK054868   | AK054868        | +      | 1400              | 6                            | 148                            | 0.18                        | 4.42                          | -24.26                         | 0.043594 | 1        |
| AK055377   | AK055377        | +      | 2933              | 0                            | 92                             | 0.00                        | 1.31                          | -Inf                           | 0.031601 | 1        |
| AK055564   | AK055564        | +      | 2735              | 83                           | 0                              | 1.30                        | 0.00                          | Inf                            | 0.040023 | 1        |
| AK055856   | AK055856        | -      | 3331              | 246                          | 24                             | 3.19                        | 0.30                          | 10.79                          | 0.037634 | 1        |
| AK056521   | AK056521        | -      | 2999              | 6                            | 285                            | 0.09                        | 3.98                          | -45.04                         | 0.002158 | 1        |
| AK056989   | AK056989        | +      | 1965              | 0                            | 112                            | 0.00                        | 2.38                          | -Inf                           | 0.015239 | 1        |
| AK057084   | AK057084        | +      | 2875              | 4                            | 137                            | 0.06                        | 2.00                          | -33.06                         | 0.038715 | 1        |
| AK057695   | AK057695        | +      | 2233              | 0                            | 84                             | 0.01                        | 1.58                          | -221.83                        | 0.042591 | 1        |
| AK057713   | AK057713        | +      | 1789              | 47                           | 354                            | 1.14                        | 8.28                          | -7.26                          | 0.036919 | 1        |
| AK057721   | AK057721        | -      | 2433              | 27                           | 262                            | 0.48                        | 4.52                          | -9.38                          | 0.041465 | 1        |
| AK057887   | AK057887        | +      | 1580              | 1                            | 141                            | 0.04                        | 3.74                          | -95.48                         | 0.012193 | 1        |
| AK074309   | AK074309        | +      | 2121              | 1                            | 99                             | 0.02                        | 1.96                          | -96.02                         | 0.04596  | 1        |
| AK090875   | AK090875        | -      | 2269              | 34                           | 314                            | 0.65                        | 5.79                          | -8.97                          | 0.031334 | 1        |
| AK090979   | AK090979        | -      | 2182              | 0                            | 138                            | 0.00                        | 2.65                          | -Inf                           | 0.006117 | 1        |
| AK091325   | AK091325        | -      | 2333              | 10                           | 204                            | 0.18                        | 3.67                          | -20.83                         | 0.024193 | 1        |
| AK092333   | AK092333        | -      | 3305              | 4                            | 184                            | 0.05                        | 2.33                          | -46.30                         | 0.011986 | 1        |
| AK095044   | AK095044        | -      | 3127              | 108                          | 0                              | 1.49                        | 0.00                          | Inf                            | 0.015532 | 1        |
| AK095515   | AK095515        | -      | 3831              | 120                          | 3                              | 1.35                        | 0.04                          | 37.08                          | 0.04276  | 1        |
| AK096412   | AK096412        | +      | 2698              | 143                          | 6                              | 2.29                        | 0.09                          | 24.78                          | 0.043642 | 1        |
| AK097550   | AK097550        | +      | 1880              | 0                            | 81                             | 0.00                        | 1.80                          | -Inf                           | 0.047683 | 1        |
| AK123088   | AK123088        | -      | 2809              | 1                            | 117                            | 0.01                        | 1.74                          | -122.75                        | 0.025826 | 1        |
| AK123571   | AK123571        | -      | 2796              | 26                           | 373                            | 0.40                        | 5.58                          | -13.84                         | 0.008432 | 1        |
| AK123803   | AK123803        | -      | 2410              | 0                            | 135                            | 0.00                        | 2.34                          | -Inf                           | 0.006783 | 1        |
| AK123881   | AK123881        | +      | 2498              | 7                            | 171                            | 0.12                        | 2.87                          | -23.70                         | 0.030694 | 1        |
| AK123915   | AK123915        | -      | 2905              | 43                           | 356                            | 0.64                        | 5.14                          | -7.98                          | 0.030143 | 1        |
| AK124143   | AK124143        | +      | 2919              | 100                          | 641                            | 1.48                        | 9.20                          | -6.22                          | 0.018639 | 1        |
| AK125471   | AK125471        | +      | 3838              | 0                            | 196                            | 0.01                        | 2.14                          | -409.38                        | 0.000913 | 1        |
| AK125525   | AK125525        | -      | 3207              | 5                            | 291                            | 0.07                        | 3.80                          | -53.04                         | 0.001413 | 1        |



| Transcript | Gene     | Strand | Transcript Length | SPRIGHTLY - EE (Reads) | Melanocyte Vector Only (Reads) | SPRIGHTLY - EE (RPKM) | Melanocyte Vector Only (RPKM) | SPRIGHTLY - EE/VO (RPKM) | p-value  | FDR      |
|------------|----------|--------|-------------------|------------------------|--------------------------------|-----------------------|-------------------------------|--------------------------|----------|----------|
| AK126194   | AK126194 | +      | 4401              | 23                     | 236                            | 0.23                  | 2.24                          | -9.79                    | 0.046726 | 1        |
| AK126629   | AK126629 | +      | 4233              | 153                    | 8                              | 1.56                  | 0.08                          | 20.60                    | 0.046817 | 1        |
| AK128884   | AK128884 | +      | 577               | 1                      | 129                            | 0.07                  | 9.37                          | -125.12                  | 0.017698 | 1        |
| AK129624   | AK129624 | +      | 2192              | 2306                   | 418                            | 45.44                 | 7.98                          | 5.69                     | 0.004192 | 1        |
| AK225987   | AK225987 | +      | 431               | 49                     | 436                            | 4.91                  | 42.38                         | -8.63                    | 0.0169   | 1        |
| AK289392   | AK289392 | -      | 1452              | 629                    | 126                            | 18.71                 | 3.62                          | 5.16                     | 0.032192 | 1        |
| AK289697   | AK289697 | +      | 2334              | 231                    | 18                             | 4.27                  | 0.32                          | 13.16                    | 0.030293 | 1        |
| AK289831   | AK289831 | +      | 3013              | 3                      | 217                            | 0.05                  | 3.02                          | -64.18                   | 0.003805 | 1        |
| AK289838   | AK289838 | -      | 1715              | 6                      | 163                            | 0.15                  | 3.98                          | -26.35                   | 0.030904 | 1        |
| AK290222   | AK290222 | +      | 2636              | 20                     | 245                            | 0.32                  | 3.90                          | -12.10                   | 0.032757 | 1        |
| AK290347   | AK290347 | +      | 3660              | 1                      | 105                            | 0.01                  | 1.20                          | -107.58                  | 0.03788  | 1        |
| AK290480   | AK290480 | +      | 607               | 448                    | 18                             | 31.89                 | 1.23                          | 25.96                    | 0.001011 | 1        |
| AK290688   | AK290688 | +      | 2660              | 304                    | 12                             | 4.94                  | 0.20                          | 25.18                    | 0.004206 | 1        |
| AK290841   | AK290841 | +      | 2132              | 0                      | 96                             | 0.00                  | 1.88                          | -Inf                     | 0.027259 | 1        |
| AK290933   | AK290933 | +      | 2273              | 143                    | 4                              | 2.72                  | 0.07                          | 36.86                    | 0.029416 | 1        |
| AK290947   | AK290947 | -      | 918               | 1448                   | 441                            | 68.13                 | 20.13                         | 3.39                     | 0.049655 | 1        |
| AK290968   | AK290968 | -      | 968               | 424                    | 55                             | 18.90                 | 2.40                          | 7.87                     | 0.02109  | 1        |
| AK291083   | AK291083 | +      | 974               | 0                      | 97                             | 0.02                  | 4.19                          | -258.49                  | 0.026274 | 1        |
| AK291204   | AK291204 | +      | 1564              | 103                    | 612                            | 2.86                  | 16.40                         | -5.74                    | 0.024866 | 1        |
| AK291345   | AK291345 | -      | 3108              | 0                      | 87                             | 0.00                  | 1.17                          | -Inf                     | 0.038064 | 1        |
| AK291449   | AK291449 | +      | 1532              | 258                    | 6                              | 7.28                  | 0.17                          | 42.51                    | 0.003145 | 1        |
| AK291473   | AK291473 | +      | 3655              | 251                    | 1                              | 2.97                  | 0.01                          | 317.81                   | 0.000414 | 0.616032 |
| AK291688   | AK291688 | -      | 3733              | 160                    | 2                              | 1.86                  | 0.02                          | 103.69                   | 0.009811 | 1        |
| AK291932   | AK291932 | +      | 1988              | 269                    | 9                              | 5.85                  | 0.20                          | 29.95                    | 0.004854 | 1        |
| AK291939   | AK291939 | +      | 1027              | 239                    | 19                             | 10.04                 | 0.76                          | 13.21                    | 0.028879 | 1        |
| AK291958   | AK291958 | +      | 1198              | 144                    | 7                              | 5.19                  | 0.24                          | 21.51                    | 0.049808 | 1        |
| AK292113   | AK292113 | +      | 1181              | 192                    | 0                              | 7.03                  | 0.01                          | 1080.89                  | 0.000852 | 0.998976 |
| AK292265   | AK292265 | -      | 1645              | 208                    | 3                              | 5.47                  | 0.08                          | 69.10                    | 0.003998 | 1        |
| AK292346   | AK292346 | +      | 2534              | 481                    | 84                             | 8.21                  | 1.38                          | 5.93                     | 0.03401  | 1        |
| AK292382   | AK292382 | +      | 1626              | 204                    | 11                             | 5.41                  | 0.29                          | 18.71                    | 0.023973 | 1        |
| AK292591   | AK292591 | +      | 2100              | 1                      | 101                            | 0.01                  | 2.02                          | -142.83                  | 0.043085 | 1        |
| AK292604   | AK292604 | -      | 3094              | 1827                   | 452                            | 25.51                 | 6.12                          | 4.16                     | 0.019424 | 1        |
| AK292728   | AK292728 | +      | 1187              | 223                    | 1465                           | 8.13                  | 51.71                         | -6.36                    | 0.004443 | 1        |
| AK292797   | AK292797 | +      | 1945              | 5                      | 188                            | 0.10                  | 4.05                          | -38.77                   | 0.014089 | 1        |
| AK292857   | AK292857 | -      | 3976              | 434                    | 67                             | 4.71                  | 0.71                          | 6.68                     | 0.030235 | 1        |
| AK292946   | AK292946 | -      | 2810              | 151                    | 8                              | 2.32                  | 0.12                          | 19.19                    | 0.048927 | 1        |
| AK292959   | AK292959 | -      | 2860              | 299                    | 12                             | 4.52                  | 0.18                          | 24.99                    | 0.004602 | 1        |
| AK293009   | AK293009 | +      | 4478              | 383                    | 1370                           | 3.70                  | 12.81                         | -3.47                    | 0.046684 | 1        |
| AK293024   | AK293024 | +      | 1232              | 106                    | 0                              | 3.71                  | 0.00                          | Inf                      | 0.016729 | 1        |
| AK307104   | AK307104 | +      | 1672              | 0                      | 91                             | 0.01                  | 2.27                          | -261.38                  | 0.032795 | 1        |
| AK307415   | AK307415 | +      | 2506              | 1                      | 245                            | 0.02                  | 4.09                          | -165.25                  | 0.000607 | 0.804385 |
| AK307427   | AK307427 | +      | 1553              | 44                     | 371                            | 1.23                  | 10.01                         | -8.11                    | 0.026723 | 1        |
| AK307450   | AK307450 | -      | 3525              | 190                    | 0                              | 2.33                  | 0.00                          | Inf                      | 0.000909 | 1        |
| AK307456   | AK307456 | +      | 1324              | 324                    | 1                              | 10.55                 | 0.05                          | 227.41                   | 6.20E-05 | 0.198858 |
| AK307533   | AK307533 | -      | 892               | 1393                   | 412                            | 67.45                 | 19.37                         | 3.48                     | 0.046166 | 1        |
| AK307566   | AK307566 | -      | 1948              | 148                    | 2                              | 3.28                  | 0.04                          | 93.26                    | 0.013881 | 1        |
| AK307574   | AK307574 | +      | 2532              | 150                    | 0                              | 2.57                  | 0.00                          | Inf                      | 0.003457 | 1        |
| AK307593   | AK307593 | +      | 2363              | 6                      | 143                            | 0.10                  | 2.53                          | -24.39                   | 0.048919 | 1        |
| AK307725   | AK307725 | +      | 1455              | 303                    | 12                             | 9.01                  | 0.34                          | 26.62                    | 0.004282 | 1        |
| AK307904   | AK307904 | -      | 1303              | 126                    | 1                              | 4.18                  | 0.03                          | 123.45                   | 0.017083 | 1        |
| AK307961   | AK307961 | -      | 1921              | 219                    | 1                              | 4.94                  | 0.02                          | 290.83                   | 0.001012 | 1        |
| AK308050   | AK308050 | +      | 1852              | 223                    | 13                             | 5.20                  | 0.30                          | 17.15                    | 0.021225 | 1        |
| AK308124   | AK308124 | -      | 1513              | 144                    | 4                              | 4.11                  | 0.11                          | 36.25                    | 0.02866  | 1        |
| AK308290   | AK308290 | -      | 1654              | 4                      | 129                            | 0.10                  | 3.26                          | -32.07                   | 0.047449 | 1        |
| AK308309   | AK308309 | -      | 1244              | 86                     | 0                              | 2.98                  | 0.00                          | Inf                      | 0.03565  | 1        |
| AK308312   | AK308312 | -      | 2900              | 0                      | 81                             | 0.00                  | 1.17                          | -Inf                     | 0.047683 | 1        |
| AK308346   | AK308346 | +      | 991               | 95                     | 0                              | 4.12                  | 0.00                          | Inf                      | 0.025283 | 1        |
| AK308354   | AK308354 | +      | 1468              | 0                      | 101                            | 0.00                  | 2.88                          | -Inf                     | 0.022692 | 1        |
| AK308400   | AK308400 | +      | 1790              | 123                    | 2                              | 2.96                  | 0.05                          | 54.43                    | 0.029002 | 1        |
| AK308664   | AK308664 | -      | 801               | 110                    | 2                              | 5.91                  | 0.11                          | 51.67                    | 0.042838 | 1        |
| AK308688   | AK308688 | +      | 1875              | 154                    | 0                              | 3.54                  | 0.00                          | Inf                      | 0.003012 | 1        |
| AK308728   | AK308728 | +      | 2411              | 10                     | 463                            | 0.18                  | 8.04                          | -43.68                   | 0.00024  | 0.451157 |



| Transcript | Gene     | Strand | Transcript Length | SPRIGHTLY - EE (Reads) | Melanocyte Vector Only (Reads) | SPRIGHTLY - EE (RPKM) | Melanocyte Vector Only (RPKM) | SPRIGHTLY - EE/VO (RPKM) | p-value  | FDR      |
|------------|----------|--------|-------------------|------------------------|--------------------------------|-----------------------|-------------------------------|--------------------------|----------|----------|
| AK308814   | AK308814 | +      | 1548              | 94                     | 1                              | 2.61                  | 0.04                          | 74.09                    | 0.048906 | 1        |
| AK309338   | AK309338 | +      | 1269              | 709                    | 46                             | 24.15                 | 1.53                          | 15.78                    | 0.000767 | 0.938792 |
| AK309491   | AK309491 | -      | 2101              | 876                    | 67                             | 18.02                 | 1.34                          | 13.43                    | 0.000708 | 0.899419 |
| AK309640   | AK309640 | +      | 966               | 103                    | 0                              | 4.59                  | 0.00                          | Inf                      | 0.018709 | 1        |
| AK309703   | AK309703 | +      | 2759              | 131                    | 2                              | 2.06                  | 0.03                          | 61.61                    | 0.022865 | 1        |
| AK309800   | AK309800 | -      | 932               | 122                    | 0                              | 5.63                  | 0.00                          | Inf                      | 0.0093   | 1        |
| AK309920   | AK309920 | +      | 1262              | 0                      | 126                            | 0.00                  | 4.20                          | -Inf                     | 0.009276 | 1        |
| AK309971   | AK309971 | +      | 1063              | 108                    | 2                              | 4.39                  | 0.10                          | 46.14                    | 0.045504 | 1        |
| AK309994   | AK309994 | +      | 1043              | 1                      | 107                            | 0.05                  | 4.30                          | -80.26                   | 0.035525 | 1        |
| AK310000   | AK310000 | +      | 955               | 447                    | 50                             | 20.23                 | 2.19                          | 9.24                     | 0.013221 | 1        |
| AK310216   | AK310216 | +      | 1891              | 154                    | 3                              | 3.53                  | 0.06                          | 60.63                    | 0.016726 | 1        |
| AK310434   | AK310434 | -      | 1004              | 2                      | 129                            | 0.08                  | 5.38                          | -66.48                   | 0.02745  | 1        |
| AK310505   | AK310505 | +      | 1069              | 0                      | 89                             | 0.00                  | 3.50                          | -Inf                     | 0.035327 | 1        |
| AK310596   | AK310596 | -      | 2605              | 219                    | 10                             | 3.63                  | 0.16                          | 23.14                    | 0.015529 | 1        |
| AK310599   | AK310599 | -      | 977               | 161                    | 1                              | 7.11                  | 0.03                          | 247.99                   | 0.00566  | 1        |
| AK310724   | AK310724 | -      | 984               | 178                    | 9                              | 7.82                  | 0.40                          | 19.71                    | 0.031297 | 1        |
| AK311190   | AK311190 | +      | 2965              | 9                      | 351                            | 0.13                  | 4.96                          | -37.83                   | 0.001266 | 1        |
| AK311334   | AK311334 | +      | 1016              | 47                     | 329                            | 2.00                  | 13.57                         | -6.77                    | 0.048547 | 1        |
| AK311386   | AK311386 | +      | 1564              | 223                    | 4                              | 6.15                  | 0.11                          | 54.43                    | 0.003923 | 1        |
| AK311433   | AK311433 | -      | 1175              | 1                      | 163                            | 0.04                  | 5.81                          | -133.74                  | 0.006247 | 1        |
| AK311488   | AK311488 | +      | 1888              | 8                      | 256                            | 0.18                  | 5.68                          | -31.16                   | 0.006205 | 1        |
| AK311550   | AK311550 | +      | 927               | 135                    | 0                              | 6.28                  | 0.00                          | Inf                      | 0.00584  | 1        |
| AK311709   | AK311709 | +      | 914               | 168                    | 0                              | 7.96                  | 0.00                          | Inf                      | 0.001874 | 1        |
| AK311761   | AK311761 | +      | 477               | 219                    | 0                              | 19.86                 | 0.03                          | 667.14                   | 0.000364 | 0.554525 |
| AK311844   | AK311844 | +      | 547               | 154                    | 956                            | 12.19                 | 73.20                         | -6.00                    | 0.010592 | 1        |
| AK311849   | AK311849 | -      | 455               | 665                    | 78                             | 63.09                 | 7.18                          | 8.78                     | 0.006108 | 1        |
| AK311862   | AK311862 | +      | 495               | 0                      | 120                            | 0.02                  | 10.17                         | -430.27                  | 0.011459 | 1        |
| AK311935   | AK311935 | -      | 430               | 1059                   | 250                            | 106.38                | 24.36                         | 4.37                     | 0.027511 | 1        |
| AK312052   | AK312052 | +      | 418               | 734                    | 103                            | 75.83                 | 10.31                         | 7.35                     | 0.00868  | 1        |
| AK312124   | AK312124 | +      | 427               | 1119                   | 69                             | 113.20                | 6.77                          | 16.72                    | 0.000144 | 0.325314 |
| AK312127   | AK312127 | -      | 443               | 170                    | 9                              | 16.55                 | 0.85                          | 19.37                    | 0.037065 | 1        |
| AK312241   | AK312241 | -      | 605               | 155                    | 0                              | 11.09                 | 0.00                          | Inf                      | 0.002911 | 1        |
| AK312261   | AK312261 | -      | 1029              | 91                     | 0                              | 3.80                  | 0.02                          | 242.67                   | 0.029436 | 1        |
| AK312391   | AK312391 | +      | 1986              | 385                    | 5                              | 8.38                  | 0.11                          | 76.74                    | 0.000163 | 0.354235 |
| AK312485   | AK312485 | -      | 1514              | 1584                   | 301                            | 45.18                 | 8.34                          | 5.42                     | 0.007783 | 1        |
| AK312553   | AK312553 | +      | 617               | 87                     | 0                              | 6.12                  | 0.00                          | Inf                      | 0.034306 | 1        |
| AK312572   | AK312572 | +      | 1533              | 693                    | 57                             | 19.54                 | 1.55                          | 12.62                    | 0.001793 | 1        |
| AK312650   | AK312650 | +      | 824               | 325                    | 10                             | 17.02                 | 0.52                          | 33.01                    | 0.002021 | 1        |
| AK312829   | AK312829 | -      | 2494              | 0                      | 84                             | 0.00                  | 1.42                          | -Inf                     | 0.042591 | 1        |
| AK312874   | AK312874 | -      | 2260              | 287                    | 38                             | 5.48                  | 0.71                          | 7.74                     | 0.04675  | 1        |
| AK313078   | AK313078 | +      | 1455              | 198                    | 7                              | 5.87                  | 0.21                          | 28.44                    | 0.014721 | 1        |
| AK313411   | AK313411 | +      | 1036              | 176                    | 1                              | 7.35                  | 0.03                          | 262.23                   | 0.00358  | 1        |
| AK313426   | AK313426 | +      | 1453              | 187                    | 0                              | 5.56                  | 0.00                          | Inf                      | 0.001002 | 1        |
| AK313620   | AK313620 | +      | 1908              | 183                    | 14                             | 4.14                  | 0.31                          | 13.48                    | 0.049467 | 1        |
| AK313905   | AK313905 | +      | 771               | 617                    | 128                            | 34.57                 | 6.95                          | 4.97                     | 0.036386 | 1        |
| AK313957   | AK313957 | +      | 1133              | 363                    | 54                             | 13.84                 | 2.00                          | 6.91                     | 0.038308 | 1        |
| AK313991   | AK313991 | -      | 2879              | 124                    | 2                              | 1.86                  | 0.02                          | 74.77                    | 0.02815  | 1        |
| AK314090   | AK314090 | +      | 3824              | 4                      | 172                            | 0.04                  | 1.89                          | -43.03                   | 0.016103 | 1        |
| AK314142   | AK314142 | -      | 445               | 1049                   | 43                             | 101.82                | 4.05                          | 25.15                    | 3.35E-05 | 0.136141 |
| AK314236   | AK314236 | +      | 2409              | 230                    | 0                              | 4.13                  | 0.00                          | Inf                      | 0.00026  | 0.451157 |
| AK314243   | AK314243 | +      | 3998              | 0                      | 98                             | 0.00                  | 1.02                          | -Inf                     | 0.025326 | 1        |
| AK314337   | AK314337 | -      | 2896              | 279                    | 33                             | 4.17                  | 0.47                          | 8.79                     | 0.040373 | 1        |
| AK314343   | AK314343 | -      | 1558              | 201                    | 8                              | 5.57                  | 0.22                          | 25.27                    | 0.016474 | 1        |
| AK314552   | AK314552 | -      | 1634              | 228                    | 3                              | 6.04                  | 0.07                          | 90.16                    | 0.002401 | 1        |
| AK314577   | AK314577 | +      | 540               | 124                    | 3                              | 9.91                  | 0.27                          | 36.77                    | 0.03824  | 1        |
| AK314635   | AK314635 | +      | 2214              | 0                      | 121                            | 0.00                  | 2.29                          | -Inf                     | 0.011061 | 1        |
| AK315096   | AK315096 | +      | 1507              | 230                    | 15                             | 6.60                  | 0.41                          | 16.14                    | 0.023244 | 1        |
| AK315098   | AK315098 | +      | 1799              | 0                      | 106                            | 0.00                  | 2.47                          | -Inf                     | 0.018918 | 1        |
| AK315103   | AK315103 | +      | 3824              | 11                     | 174                            | 0.12                  | 1.90                          | -15.65                   | 0.049038 | 1        |
| AK315211   | AK315211 | +      | 2718              | 138                    | 3                              | 2.19                  | 0.05                          | 46.72                    | 0.025931 | 1        |
| AK315465   | AK315465 | +      | 2210              | 441                    | 1                              | 8.62                  | 0.02                          | 454.62                   | 4.19E-06 | 0.036482 |
| AK315469   | AK315469 | +      | 1329              | 70                     | 534                            | 2.29                  | 16.82                         | -7.35                    | 0.016259 | 1        |

| Transcript | Gene     | Strand | Transcript Length | SPRIGHTLY-EE (Reads) | Melanocyte Vector Only (Reads) | SPRIGHTLY-EE (RPKM) | Melanocyte Vector Only (RPKM) | SPRIGHTLY-EE/VO (RPKM) | p-value  | FDR      |
|------------|----------|--------|-------------------|----------------------|--------------------------------|---------------------|-------------------------------|------------------------|----------|----------|
| AK315666   | AK315666 | -      | 194               | 384                  | 30                             | 85.52               | 6.37                          | 13.42                  | 0.008321 | 1        |
| AK316611   | AK316611 | -      | 865               | 1287                 | 151                            | 64.26               | 7.31                          | 8.79                   | 0.001477 | 1        |
| AL110132   | AL110132 | -      | 4163              | 140                  | 2                              | 1.45                | 0.02                          | 81.40                  | 0.017537 | 1        |
| AL117623   | AL117623 | -      | 1443              | 3                    | 175                            | 0.08                | 5.07                          | -61.81                 | 0.011064 | 1        |
| AL137257   | AL137257 | +      | 4516              | 538                  | 1869                           | 5.15                | 17.34                         | -3.37                  | 0.041856 | 1        |
| AL137522   | AL137522 | -      | 2908              | 0                    | 89                             | 0.00                | 1.28                          | -Inf                   | 0.035327 | 1        |
| AL389956   | AL389956 | -      | 1663              | 1                    | 123                            | 0.03                | 3.10                          | -119.30                | 0.021365 | 1        |
| AL390130   | AL390130 | +      | 3458              | 18                   | 223                            | 0.22                | 2.70                          | -12.02                 | 0.039595 | 1        |
| AL512699   | AL512699 | -      | 1936              | 148                  | 4                              | 3.31                | 0.09                          | 37.51                  | 0.02583  | 1        |
| AL832747   | AL832747 | -      | 2098              | 83                   | 633                            | 1.71                | 12.65                         | -7.38                  | 0.011603 | 1        |
| AL834285   | AL834285 | +      | 2471              | 189                  | 963                            | 3.31                | 16.32                         | -4.93                  | 0.020345 | 1        |
| AY206700   | AY206700 | +      | 164               | 4                    | 393                            | 0.96                | 100.37                        | -104.64                | 0.000118 | 0.308029 |
| AY208842   | AY208842 | -      | 872               | 82                   | 0                              | 4.05                | 0.00                          | Inf                    | 0.041602 | 1        |
| AY562999   | AY562999 | +      | 391               | 78                   | 0                              | 8.63                | 0.00                          | Inf                    | 0.048596 | 1        |
| AY952890   | AY952890 | -      | 655               | 176                  | 1                              | 11.60               | 0.05                          | 216.71                 | 0.00358  | 1        |
| BC001224   | BC001224 | +      | 1674              | 193                  | 7                              | 4.98                | 0.17                          | 28.61                  | 0.016451 | 1        |
| BC004287   | BC004287 | -      | 3156              | 56                   | 372                            | 0.77                | 4.94                          | -6.44                  | 0.043687 | 1        |
| BC011670   | BC011670 | +      | 921               | 155                  | 0                              | 7.27                | 0.01                          | 952.70                 | 0.002911 | 1        |
| BC014066   | BC014066 | +      | 515               | 1080                 | 88                             | 90.58               | 7.16                          | 12.65                  | 0.000501 | 0.693944 |
| BC014135   | BC014135 | -      | 2150              | 214                  | 11                             | 4.30                | 0.21                          | 20.06                  | 0.019698 | 1        |
| BC017047   | BC017047 | -      | 159               | 3065                 | 981                            | 832.56              | 258.50                        | 3.22                   | 0.039745 | 1        |
| BC017971   | BC017971 | +      | 988               | 124                  | 4                              | 5.43                | 0.16                          | 33.20                  | 0.048399 | 1        |
| BC018658   | BC018658 | +      | 1166              | 117                  | 0                              | 4.34                | 0.00                          | Inf                    | 0.011154 | 1        |
| BC020582   | BC020582 | +      | 3293              | 21                   | 341                            | 0.28                | 4.34                          | -15.74                 | 0.008399 | 1        |
| BC034271   | BC034271 | +      | 2101              | 100                  | 0                              | 2.06                | 0.00                          | Inf                    | 0.020936 | 1        |
| BC034627   | BC034627 | +      | 775               | 98                   | 1                              | 5.47                | 0.06                          | 85.20                  | 0.042794 | 1        |
| BC035145   | BC035145 | -      | 5423              | 6                    | 191                            | 0.05                | 1.48                          | -32.24                 | 0.016396 | 1        |
| BC035309   | BC035309 | -      | 1212              | 87                   | 0                              | 3.11                | 0.00                          | Inf                    | 0.034306 | 1        |
| BC037167   | BC037167 | +      | 1088              | 0                    | 181                            | 0.00                | 6.98                          | -Inf                   | 0.001469 | 1        |
| BC037585   | BC037585 | +      | 1601              | 293                  | 16                             | 7.92                | 0.42                          | 18.93                  | 0.008745 | 1        |
| BC043178   | BC043178 | -      | 1468              | 2                    | 269                            | 0.05                | 7.68                          | -151.62                | 0.000647 | 0.839792 |
| BC051735   | BC051735 | +      | 1723              | 2                    | 190                            | 0.04                | 4.63                          | -105.54                | 0.004987 | 1        |
| BC061915   | BC061915 | +      | 290               | 1                    | 1192                           | 0.12                | 172.21                        | -1462.99               | 9.13E-11 | 2.78E-06 |
| BC062785   | BC062785 | +      | 190               | 1245                 | 4001                           | 283.08              | 882.22                        | -3.12                  | 0.039786 | 1        |
| BC063441   | BC063441 | -      | 1469              | 167                  | 5                              | 4.92                | 0.16                          | 31.67                  | 0.020171 | 1        |
| BC105975   | BC105975 | -      | 1063              | 138                  | 1                              | 5.62                | 0.04                          | 136.10                 | 0.011632 | 1        |
| BC107040   | BC107040 | -      | 449               | 41                   | 366                            | 3.94                | 34.15                         | -8.66                  | 0.024378 | 1        |
| BC112349   | BC112349 | -      | 1846              | 18                   | 314                            | 0.41                | 7.12                          | -17.21                 | 0.009284 | 1        |
| BC128391   | BC128391 | +      | 2412              | 162                  | 7                              | 2.90                | 0.12                          | 23.86                  | 0.033036 | 1        |
| BC129981   | BC129981 | -      | 2447              | 1                    | 122                            | 0.01                | 2.08                          | -169.19                | 0.022049 | 1        |
| BC136547   | BC136547 | -      | 1802              | 533                  | 31                             | 12.78               | 0.73                          | 17.46                  | 0.001429 | 1        |
| BC136679   | BC136679 | +      | 3207              | 408                  | 19                             | 5.49                | 0.25                          | 21.88                  | 0.002067 | 1        |
| BC137070   | BC137070 | +      | 3475              | 15                   | 226                            | 0.19                | 2.72                          | -14.61                 | 0.028742 | 1        |
| BC137128   | BC137128 | +      | 4520              | 71                   | 590                            | 0.68                | 5.47                          | -8.10                  | 0.010504 | 1        |
| BC137129   | BC137129 | +      | 4516              | 72                   | 586                            | 0.69                | 5.44                          | -7.91                  | 0.011294 | 1        |
| BC140099   | BC140099 | +      | 839               | 0                    | 111                            | 0.01                | 5.54                          | -749.82                | 0.015796 | 1        |
| BC141838   | BC141838 | +      | 3306              | 401                  | 43                             | 5.23                | 0.54                          | 9.66                   | 0.015331 | 1        |
| BC142953   | BC142953 | +      | 3684              | 61                   | 761                            | 0.72                | 8.65                          | -12.03                 | 0.001608 | 1        |
| BC142963   | BC142963 | -      | 2716              | 416                  | 69                             | 6.61                | 1.06                          | 6.26                   | 0.038299 | 1        |
| BC142998   | BC142998 | +      | 1661              | 4                    | 164                            | 0.09                | 4.14                          | -44.21                 | 0.019638 | 1        |
| BC146662   | BC146662 | +      | 3306              | 401                  | 43                             | 5.23                | 0.54                          | 9.66                   | 0.015331 | 1        |
| BC146779   | BC146779 | -      | 5940              | 5                    | 152                            | 0.04                | 1.07                          | -29.47                 | 0.033041 | 1        |
| BC146790   | BC146790 | -      | 6445              | 9                    | 238                            | 0.06                | 1.55                          | -27.07                 | 0.010651 | 1        |
| BC146801   | BC146801 | -      | 4440              | 4                    | 151                            | 0.04                | 1.42                          | -33.84                 | 0.027185 | 1        |
| BC150253   | BC150253 | +      | 5923              | 75                   | 488                            | 0.55                | 3.45                          | -6.33                  | 0.028729 | 1        |
| BC150296   | BC150296 | -      | 4735              | 6                    | 197                            | 0.06                | 1.75                          | -30.13                 | 0.014337 | 1        |
| BC151217   | BC151217 | +      | 6019              | 5                    | 144                            | 0.03                | 1.00                          | -29.37                 | 0.040042 | 1        |
| BC157118   | BC157118 | -      | 4869              | 21                   | 228                            | 0.18                | 1.96                          | -10.70                 | 0.045972 | 1        |
| BC160042   | BC160042 | +      | 2454              | 288                  | 24                             | 5.07                | 0.41                          | 12.32                  | 0.020053 | 1        |
| BC160043   | BC160043 | -      | 2193              | 168                  | 1                              | 3.32                | 0.02                          | 161.75                 | 0.004566 | 1        |
| BC160143   | BC160143 | -      | 769               | 89                   | 0                              | 4.99                | 0.00                          | Inf                    | 0.031774 | 1        |
| BX537506   | BX537506 | -      | 4010              | 17                   | 258                            | 0.19                | 2.70                          | -14.48                 | 0.020452 | 1        |

| Transcript | Gene     | Strand | Transcript Length | SPRIGTLTY - EE (Reads) | Melanocyte Vector Only (Reads) | SPRIGTLTY - EE (RPKM) | Melanocyte Vector Only (RPKM) | SPRIGTLTY - EE/VO (RPKM) | p-value  | FDR      |
|------------|----------|--------|-------------------|------------------------|--------------------------------|-----------------------|-------------------------------|--------------------------|----------|----------|
| BX537723   | BX537723 | -      | 4970              | 13                     | 186                            | 0.11                  | 1.57                          | -13.94                   | 0.048056 | 1        |
| BX640629   | BX640629 | +      | 4272              | 56                     | 386                            | 0.56                  | 3.79                          | -6.73                    | 0.03795  | 1        |
| BX647881   | BX647881 | -      | 1888              | 2                      | 111                            | 0.05                  | 2.46                          | -53.83                   | 0.046302 | 1        |
| BX648054   | BX648054 | +      | 1719              | 13651                  | 49136                          | 343.00                | 1,197.47                      | -3.49                    | 0.016479 | 1        |
| BX648591   | BX648591 | +      | 1933              | 44                     | 359                            | 0.98                  | 7.79                          | -7.92                    | 0.030548 | 1        |
| BX648621   | BX648621 | +      | 1384              | 137                    | 2                              | 4.27                  | 0.05                          | 82.45                    | 0.019153 | 1        |
| BX649145   | BX649145 | -      | 2823              | 6                      | 163                            | 0.09                  | 2.42                          | -26.35                   | 0.030904 | 1        |
| CR590510   | CR590510 | +      | 1627              | 541                    | 117                            | 14.35                 | 3.03                          | 4.74                     | 0.048444 | 1        |
| CR590583   | CR590583 | -      | 1108              | 583                    | 82                             | 22.71                 | 3.11                          | 7.31                     | 0.013714 | 1        |
| CR594593   | CR594593 | +      | 529               | 417                    | 1549                           | 34.05                 | 122.68                        | -3.60                    | 0.037353 | 1        |
| CR595375   | CR595375 | +      | 1829              | 257                    | 10                             | 6.07                  | 0.22                          | 27.48                    | 0.00733  | 1        |
| CR596839   | CR596839 | +      | 1618              | 601                    | 129                            | 16.04                 | 3.33                          | 4.82                     | 0.041303 | 1        |
| CR597676   | CR597676 | -      | 1547              | 1                      | 354                            | 0.03                  | 9.57                          | -285.62                  | 3.93E-05 | 0.14992  |
| CR598503   | CR598503 | +      | 1594              | 0                      | 80                             | 0.00                  | 2.09                          | -Inf                     | 0.049518 | 1        |
| CR601361   | CR601361 | -      | 1136              | 16                     | 200                            | 0.61                  | 7.36                          | -12.00                   | 0.049219 | 1        |
| CR601441   | CR601441 | +      | 997               | 555                    | 112                            | 24.06                 | 4.71                          | 5.11                     | 0.039247 | 1        |
| CR601532   | CR601532 | +      | 1891              | 2                      | 120                            | 0.05                  | 2.66                          | -58.19                   | 0.035616 | 1        |
| CR601669   | CR601669 | -      | 588               | 233                    | 8                              | 17.15                 | 0.59                          | 29.30                    | 0.008362 | 1        |
| CR602716   | CR602716 | -      | 1542              | 35                     | 484                            | 0.98                  | 13.16                         | -13.47                   | 0.004359 | 1        |
| CR603195   | CR603195 | +      | 1619              | 18                     | 450                            | 0.49                  | 11.63                         | -23.60                   | 0.001238 | 1        |
| CR603325   | CR603325 | -      | 579               | 0                      | 91                             | 0.00                  | 6.55                          | -Inf                     | 0.032795 | 1        |
| CR603492   | CR603492 | -      | 891               | 1                      | 115                            | 0.05                  | 5.41                          | -111.54                  | 0.027519 | 1        |
| CR604798   | CR604798 | +      | 658               | 0                      | 91                             | 0.00                  | 5.81                          | -Inf                     | 0.032795 | 1        |
| CR609959   | CR609959 | +      | 753               | 121                    | 0                              | 6.96                  | 0.03                          | 258.20                   | 0.009643 | 1        |
| CR610863   | CR610863 | +      | 1455              | 235                    | 24                             | 6.98                  | 0.68                          | 10.29                    | 0.044461 | 1        |
| CR611300   | CR611300 | +      | 760               | 0                      | 109                            | 0.02                  | 6.01                          | -257.76                  | 0.016974 | 1        |
| CR611332   | CR611332 | +      | 2122              | 23                     | 324                            | 0.47                  | 6.40                          | -13.66                   | 0.012887 | 1        |
| CR612665   | CR612665 | +      | 415               | 111                    | 2                              | 11.60                 | 0.25                          | 46.95                    | 0.041565 | 1        |
| CR613504   | CR613504 | -      | 2640              | 145                    | 0                              | 2.38                  | 0.00                          | Inf                      | 0.004111 | 1        |
| CR615526   | CR615526 | -      | 1248              | 0                      | 271                            | 0.01                  | 9.08                          | -735.95                  | 9.97E-05 | 0.284068 |
| CR616040   | CR616040 | +      | 1508              | 278                    | 21                             | 7.96                  | 0.58                          | 13.65                    | 0.018329 | 1        |
| CR617021   | CR617021 | -      | 1132              | 30                     | 267                            | 1.16                  | 9.89                          | -8.56                    | 0.046145 | 1        |
| CR620814   | CR620814 | +      | 736               | 119                    | 1                              | 7.01                  | 0.05                          | 127.98                   | 0.021431 | 1        |
| CR621085   | CR621085 | +      | 1547              | 162                    | 8                              | 4.54                  | 0.20                          | 22.18                    | 0.03841  | 1        |
| CR621148   | CR621148 | -      | 1841              | 0                      | 121                            | 0.00                  | 2.75                          | -Inf                     | 0.011061 | 1        |
| CR624032   | CR624032 | +      | 865               | 78                     | 448                            | 3.89                  | 21.70                         | -5.57                    | 0.044309 | 1        |
| CR624199   | CR624199 | +      | 1492              | 12                     | 254                            | 0.36                  | 7.14                          | -19.91                   | 0.012371 | 1        |
| CR624876   | CR624876 | -      | 907               | 335                    | 12                             | 15.97                 | 0.54                          | 29.43                    | 0.002428 | 1        |
| CR626202   | CR626202 | +      | 940               | 108                    | 2                              | 4.97                  | 0.07                          | 69.44                    | 0.045504 | 1        |
| D10518     | D10518   | +      | 248               | 165                    | 0                              | 28.70                 | 0.00                          | Inf                      | 0.002073 | 1        |
| D28382     | D28382   | -      | 194               | 5                      | 142                            | 1.18                  | 30.76                         | -26.14                   | 0.042019 | 1        |
| DQ351291   | DQ351291 | -      | 1830              | 61                     | 386                            | 1.45                  | 8.85                          | -6.12                    | 0.045443 | 1        |
| DQ407611   | DQ407611 | -      | 456               | 136                    | 3                              | 12.85                 | 0.25                          | 51.88                    | 0.027404 | 1        |
| EF532594   | EF532594 | -      | 1551              | 128                    | 0                              | 3.57                  | 0.00                          | Inf                      | 0.007493 | 1        |
| EF576990   | EF576990 | +      | 912               | 323                    | 0                              | 15.28                 | 0.01                          | 1642.87                  | 1.87E-05 | 0.094778 |
| EU176179   | EU176179 | -      | 2349              | 268                    | 31                             | 4.92                  | 0.56                          | 8.84                     | 0.042009 | 1        |
| EU176361   | EU176361 | +      | 2759              | 83                     | 0                              | 1.29                  | 0.00                          | Inf                      | 0.040023 | 1        |
| EU176445   | EU176445 | -      | 2158              | 555                    | 66                             | 11.11                 | 1.28                          | 8.71                     | 0.009529 | 1        |
| EU176637   | EU176637 | -      | 680               | 292                    | 35                             | 18.57                 | 2.15                          | 8.64                     | 0.037823 | 1        |
| EU176713   | EU176713 | +      | 1217              | 79                     | 0                              | 2.80                  | 0.01                          | 207.70                   | 0.04674  | 1        |
| EU176719   | EU176719 | -      | 1409              | 199                    | 14                             | 6.09                  | 0.42                          | 14.42                    | 0.036815 | 1        |
| EU176729   | EU176729 | -      | 1608              | 8                      | 159                            | 0.22                  | 4.15                          | -18.63                   | 0.046196 | 1        |
| EU188666   | EU188666 | +      | 528               | 237                    | 6                              | 19.39                 | 0.49                          | 39.94                    | 0.004991 | 1        |
| EU188668   | EU188668 | +      | 566               | 191                    | 12                             | 14.59                 | 0.90                          | 16.14                    | 0.034777 | 1        |
| EU287939   | EU287939 | +      | 1449              | 133                    | 0                              | 3.96                  | 0.00                          | Inf                      | 0.006269 | 1        |
| EU293605   | EU293605 | +      | 2173              | 103                    | 0                              | 2.05                  | 0.00                          | Inf                      | 0.018709 | 1        |
| EU434648   | EU434648 | -      | 1903              | 185                    | 11                             | 4.20                  | 0.24                          | 17.76                    | 0.034921 | 1        |
| EU446763   | EU446763 | -      | 1611              | 414                    | 22                             | 11.09                 | 0.56                          | 19.68                    | 0.002688 | 1        |
| EU446857   | EU446857 | -      | 1610              | 80                     | 0                              | 2.14                  | 0.01                          | 194.01                   | 0.044958 | 1        |
| EU446993   | EU446993 | +      | 1351              | 109                    | 0                              | 3.47                  | 0.00                          | Inf                      | 0.014967 | 1        |
| EU831591   | EU831591 | -      | 2266              | 0                      | 109                            | 0.00                  | 2.02                          | -Inf                     | 0.016974 | 1        |
| EU831940   | EU831940 | +      | 882               | 500                    | 37                             | 24.48                 | 1.76                          | 13.93                    | 0.003408 | 1        |

| Transcript   | Gene         | Strand | Transcript Length | SPRIGHTLY-EE (Reads) | Melanocyte Vector Only (Reads) | SPRIGHTLY-EE (RPKM) | Melanocyte Vector Only (RPKM) | SPRIGHTLY-EE/VO (RPKM) | p-value  | FDR      |
|--------------|--------------|--------|-------------------|----------------------|--------------------------------|---------------------|-------------------------------|------------------------|----------|----------|
| EU832289     | EU832289     | +      | 434               | 150                  | 0                              | 14.96               | 0.04                          | 370.10                 | 0.003457 | 1        |
| hsa-mir-3654 | hsa-mir-3654 | -      | 56                | 271                  | 30                             | 209.03              | 22.44                         | 9.31                   | 0.038099 | 1        |
| L13806       | L13806       | -      | 562               | 365                  | 2                              | 28.03               | 0.18                          | 153.95                 | 5.28E-05 | 0.182757 |
| L39924       | L39924       | -      | 267               | 198                  | 13                             | 32.03               | 2.04                          | 15.70                  | 0.033887 | 1        |
| M12377       | M12377       | +      | 285               | 194                  | 8                              | 29.46               | 1.15                          | 25.69                  | 0.019148 | 1        |
| NM_000123    | ERCC5        | +      | 4085              | 1                    | 128                            | 0.01                | 1.31                          | -91.83                 | 0.018261 | 1        |
| NM_000124    | ERCC6        | -      | 7006              | 57                   | 446                            | 0.35                | 2.67                          | -7.59                  | 0.021823 | 1        |
| NM_000268    | NF2          | +      | 6029              | 303                  | 30                             | 2.17                | 0.21                          | 10.45                  | 0.024549 | 1        |
| NM_000661    | RPL9         | -      | 749               | 152                  | 0                              | 8.77                | 0.01                          | 766.42                 | 0.003226 | 1        |
| NM_000737    | CGB          | -      | 879               | 78                   | 0                              | 3.83                | 0.00                          | Inf                    | 0.048596 | 1        |
| NM_000985    | RPL17        | -      | 963               | 148                  | 6                              | 6.62                | 0.26                          | 25.52                  | 0.038749 | 1        |
| NM_000994    | RPL32        | -      | 1651              | 98                   | 680                            | 2.57                | 17.25                         | -6.72                  | 0.013336 | 1        |
| NM_001001392 | CD44         | +      | 3969              | 137                  | 834                            | 1.49                | 8.81                          | -5.92                  | 0.014052 | 1        |
| NM_001001890 | RUNX1        | -      | 7274              | 104                  | 541                            | 0.62                | 3.11                          | -5.03                  | 0.042423 | 1        |
| NM_001004722 | NCK2         | +      | 1795              | 0                    | 90                             | 0.00                | 2.10                          | -Inf                   | 0.034037 | 1        |
| NM_001006616 | TSPAN17      | +      | 2547              | 1                    | 100                            | 0.01                | 1.64                          | -114.81                | 0.044498 | 1        |
| NM_001007239 | METTL13      | +      | 2939              | 0                    | 105                            | 0.01                | 1.50                          | -220.43                | 0.019617 | 1        |
| NM_001008800 | CCT3         | -      | 1993              | 1,379                | 299                            | 29.88               | 6.29                          | 4.75                   | 0.015259 | 1        |
| NM_001009186 | CCT6A        | +      | 2529              | 487                  | 98                             | 8.32                | 1.63                          | 5.10                   | 0.046947 | 1        |
| NM_001009554 | MFAP3L       | -      | 5827              | 17                   | 250                            | 0.12                | 1.80                          | -14.65                 | 0.023313 | 1        |
| NM_001009999 | KDM1A        | +      | 3107              | 587                  | 84                             | 8.15                | 1.13                          | 7.19                   | 0.014202 | 1        |
| NM_001010862 | SPIN3        | -      | 4459              | 5                    | 167                            | 0.05                | 1.57                          | -30.85                 | 0.023103 | 1        |
| NM_001012321 | RPSA         | +      | 1095              | 308                  | 9                              | 12.15               | 0.33                          | 36.29                  | 0.002273 | 1        |
| NM_001013251 | SLC3A2       | +      | 1932              | 2,007                | 547                            | 44.86               | 11.87                         | 3.78                   | 0.026447 | 1        |
| NM_001013642 | TRNP1        | +      | 1949              | 68                   | 483                            | 1.51                | 10.38                         | -6.89                  | 0.023625 | 1        |
| NM_001013732 | C6orf138     | -      | 2850              | 3                    | 198                            | 0.04                | 2.91                          | -69.72                 | 0.006133 | 1        |
| NM_001014796 | DDR2         | +      | 3244              | 67                   | 426                            | 0.90                | 5.50                          | -6.14                  | 0.038205 | 1        |
| NM_001017370 | NHLRC3       | +      | 3348              | 0                    | 162                            | 0.00                | 2.03                          | -Inf                   | 0.002725 | 1        |
| NM_001018009 | SH3BP5       | -      | 2706              | 0                    | 120                            | 0.00                | 1.85                          | -Inf                   | 0.011459 | 1        |
| NM_001018038 | VPS13A       | +      | 10176             | 388                  | 15                             | 1.65                | 0.06                          | 26.48                  | 0.001621 | 1        |
| NM_001024074 | HNMT         | +      | 739               | 100                  | 0                              | 5.87                | 0.00                          | Inf                    | 0.020936 | 1        |
| NM_001024213 | S100A13      | -      | 551               | 120                  | 0                              | 9.42                | 0.00                          | Inf                    | 0.01     | 1        |
| NM_001024218 | GPHN         | +      | 4203              | 214                  | 6                              | 2.20                | 0.06                          | 34.20                  | 0.008359 | 1        |
| NM_001024382 | HMBS         | +      | 1411              | 109                  | 2                              | 3.33                | 0.07                          | 47.95                  | 0.04415  | 1        |
| NM_001024736 | CD276        | +      | 3401              | 10                   | 217                            | 0.13                | 2.67                          | -21.01                 | 0.018767 | 1        |
| NM_001024843 | TNRC6B       | +      | 15959             | 49                   | 943                            | 0.13                | 2.48                          | -18.77                 | 0.000172 | 0.362359 |
| NM_001025077 | CELF2        | +      | 9239              | 198                  | 931                            | 0.92                | 4.22                          | -4.57                  | 0.027532 | 1        |
| NM_001030287 | ATF3         | +      | 1898              | 98                   | 0                              | 2.23                | 0.00                          | Inf                    | 0.022572 | 1        |
| NM_001031719 | DHRS12       | -      | 1324              | 87                   | 0                              | 2.82                | 0.00                          | Inf                    | 0.034306 | 1        |
| NM_001032280 | TFAP2A       | -      | 3808              | 69                   | 639                            | 0.78                | 7.03                          | -8.97                  | 0.006438 | 1        |
| NM_001033059 | AMD1         | +      | 3103              | 99                   | 551                            | 1.37                | 7.43                          | -5.42                  | 0.034824 | 1        |
| NM_001033556 | PPM1B        | +      | 1497              | 106                  | 0                              | 3.05                | 0.00                          | Inf                    | 0.016729 | 1        |
| NM_001033853 | RPL3         | -      | 1191              | 1,170                | 334                            | 42.44               | 11.75                         | 3.61                   | 0.04695  | 1        |
| NM_001034025 | ERP29        | +      | 1333              | 0                    | 135                            | 0.01                | 4.25                          | -783.34                | 0.006783 | 1        |
| NM_001034996 | RPL14        | +      | 917               | 416                  | 59                             | 19.59               | 2.72                          | 7.21                   | 0.026891 | 1        |
| NM_001037277 | GGPS1        | +      | 2744              | 2                    | 136                            | 0.03                | 2.07                          | -81.76                 | 0.02245  | 1        |
| NM_001037495 | DYNLL1       | +      | 736               | 7                    | 234                            | 0.44                | 13.33                         | -30.33                 | 0.007942 | 1        |
| NM_001038628 | B3GALNT1     | -      | 3641              | 207                  | 6                              | 2.45                | 0.07                          | 37.72                  | 0.0098   | 1        |
| NM_001039538 | MAP2         | +      | 5844              | 12                   | 194                            | 0.09                | 1.39                          | -16.03                 | 0.037374 | 1        |
| NM_001039589 | DPH2         | +      | 1813              | 88                   | 0                              | 2.10                | 0.01                          | 283.85                 | 0.033015 | 1        |
| NM_001040058 | SPP1         | +      | 1625              | 503                  | 4                              | 13.36               | 0.10                          | 134.70                 | 1.12E-05 | 0.06182  |
| NM_001040200 | CLDND1       | -      | 1874              | 0                    | 127                            | 0.01                | 2.83                          | -297.45                | 0.008957 | 1        |
| NM_001040875 | GDAP1        | +      | 3724              | 142                  | 6                              | 1.65                | 0.07                          | 23.79                  | 0.044694 | 1        |
| NM_001042481 | FRMD6        | +      | 5035              | 14                   | 214                            | 0.12                | 1.78                          | -14.78                 | 0.03206  | 1        |
| NM_001042486 | DLGAP4       | +      | 3009              | 100                  | 0                              | 1.44                | 0.00                          | Inf                    | 0.020936 | 1        |
| NM_001042601 | TTC14        | +      | 4787              | 3                    | 147                            | 0.02                | 1.29                          | -52.08                 | 0.023092 | 1        |
| NM_001071    | TYMS         | +      | 1583              | 563                  | 75                             | 15.35               | 2.00                          | 7.69                   | 0.012649 | 1        |
| NM_001078176 | SLC29A1      | +      | 2128              | 68                   | 465                            | 1.38                | 9.15                          | -6.63                  | 0.027753 | 1        |
| NM_001079518 | MED24        | -      | 3698              | 489                  | 68                             | 5.71                | 0.77                          | 7.41                   | 0.018785 | 1        |
| NM_001079559 | HNRNPUL2     | -      | 5147              | 66                   | 433                            | 0.55                | 3.52                          | -6.38                  | 0.034635 | 1        |
| NM_001080125 | CASP8        | +      | 2935              | 2                    | 167                            | 0.03                | 2.38                          | -84.18                 | 0.009366 | 1        |
| NM_001083585 | RABEP1       | +      | 5303              | 25                   | 299                            | 0.20                | 2.36                          | -11.51                 | 0.021555 | 1        |

| Transcript   | Gene      | Strand | Transcript Length | SPRIGHTLY-EE (Reads) | Melanocyte Vector Only (Reads) | SPRIGHTLY-EE (RPKM) | Melanocyte Vector Only (RPKM) | SPRIGHTLY-EE/VO (RPKM) | p-value  | FDR      |
|--------------|-----------|--------|-------------------|----------------------|--------------------------------|---------------------|-------------------------------|------------------------|----------|----------|
| NM_001093767 | FAM195B   | -      | 925               | 267                  | 23                             | 12.47               | 1.03                          | 12.12                  | 0.025484 | 1        |
| NM_001098621 | C14orf109 | +      | 1277              | 353                  | 21                             | 11.96               | 0.69                          | 17.29                  | 0.005845 | 1        |
| NM_001101653 | COMMD9    | -      | 2848              | 0                    | 80                             | 0.00                | 1.18                          | -Inf                   | 0.049518 | 1        |
| NM_001104925 | PCMTD2    | +      | 3831              | 0                    | 92                             | 0.00                | 1.00                          | -Inf                   | 0.031601 | 1        |
| NM_001105568 | KIF13A    | -      | 5858              | 104                  | 547                            | 0.77                | 3.91                          | -5.10                  | 0.040622 | 1        |
| NM_001113513 | ARHGEF7   | +      | 4946              | 13                   | 184                            | 0.11                | 1.56                          | -13.59                 | 0.04985  | 1        |
| NM_001113547 | LIMA1     | -      | 3622              | 88                   | 674                            | 1.05                | 7.79                          | -7.41                  | 0.010111 | 1        |
| NM_001122607 | RUNX1     | -      | 2722              | 221                  | 8                              | 3.50                | 0.12                          | 29.89                  | 0.010762 | 1        |
| NM_001122770 | ZBTB37    | +      | 2300              | 0                    | 85                             | 0.00                | 1.56                          | -Inf                   | 0.041023 | 1        |
| NM_001122824 | TACC1     | +      | 6572              | 222                  | 2,261                          | 1.46                | 14.41                         | -9.87                  | 0.0003   | 0.469304 |
| NM_001122964 | SMEK2     | -      | 4458              | 38                   | 434                            | 0.37                | 4.08                          | -11.02                 | 0.00945  | 1        |
| NM_001127371 | CDCA7L    | -      | 2770              | 217                  | 21                             | 3.38                | 0.32                          | 10.53                  | 0.048092 | 1        |
| NM_001127458 | CRLS1     | +      | 3652              | 227                  | 23                             | 2.68                | 0.26                          | 10.34                  | 0.047072 | 1        |
| NM_001128226 | DIS3      | -      | 7554              | 5                    | 260                            | 0.03                | 1.44                          | -54.09                 | 0.002758 | 1        |
| NM_001128616 | ARHGEF3   | -      | 4055              | 235                  | 13                             | 2.50                | 0.13                          | 18.81                  | 0.016994 | 1        |
| NM_001129889 | DCT       | -      | 2397              | 581                  | 101                            | 10.46               | 1.76                          | 5.94                   | 0.0247   | 1        |
| NM_001130060 | ATF7      | -      | 6625              | 30                   | 362                            | 0.20                | 2.29                          | -11.72                 | 0.013246 | 1        |
| NM_001130689 | HMGB2     | -      | 1454              | 189                  | 11                             | 5.62                | 0.32                          | 17.48                  | 0.032253 | 1        |
| NM_001130690 | PDE10A    | -      | 8189              | 17                   | 205                            | 0.09                | 1.05                          | -11.56                 | 0.049124 | 1        |
| NM_001130725 | PSMB5     | -      | 941               | 967                  | 252                            | 44.39               | 11.24                         | 3.95                   | 0.041643 | 1        |
| NM_001134296 | AP3M2     | +      | 3670              | 4                    | 359                            | 0.04                | 4.10                          | -95.87                 | 0.000234 | 0.451157 |
| NM_001134367 | SLC6A6    | +      | 6504              | 203                  | 1,028                          | 1.35                | 6.62                          | -4.91                  | 0.01909  | 1        |
| NM_001134420 | CDC7      | +      | 3313              | 157                  | 8                              | 2.04                | 0.10                          | 20.14                  | 0.04287  | 1        |
| NM_001134422 | CDV3      | +      | 4197              | 38                   | 329                            | 0.39                | 3.28                          | -8.47                  | 0.032253 | 1        |
| NM_001134759 | CRYZ      | -      | 1976              | 1                    | 102                            | 0.01                | 2.16                          | -181.35                | 0.041718 | 1        |
| NM_001135055 | TKT       | -      | 2952              | 151                  | 4                              | 2.21                | 0.06                          | 35.28                  | 0.023898 | 1        |
| NM_001135240 | C1orf226  | +      | 984               | 82                   | 0                              | 3.62                | 0.00                          | Inf                    | 0.041602 | 1        |
| NM_001135643 | DCTN4     | -      | 3908              | 106                  | 608                            | 1.17                | 6.52                          | -5.58                  | 0.027654 | 1        |
| NM_001135651 | EIF2AK2   | -      | 2696              | 7                    | 187                            | 0.11                | 2.91                          | -26.51                 | 0.021654 | 1        |
| NM_001135745 | ALS2      | -      | 2892              | 348                  | 13                             | 5.19                | 0.19                          | 26.77                  | 0.002288 | 1        |
| NM_001135821 | FDPS      | +      | 1481              | 323                  | 32                             | 9.42                | 0.90                          | 10.43                  | 0.021267 | 1        |
| NM_001135919 | SLC46A3   | -      | 2800              | 205                  | 17                             | 3.16                | 0.26                          | 12.28                  | 0.043331 | 1        |
| NM_001136051 | LRIG3     | -      | 3661              | 335                  | 39                             | 3.96                | 0.44                          | 8.93                   | 0.027097 | 1        |
| NM_001136115 | FBXO28    | +      | 5253              | 71                   | 443                            | 0.58                | 3.54                          | -6.09                  | 0.037357 | 1        |
| NM_001136123 | FAM178A   | +      | 4122              | 262                  | 11                             | 2.75                | 0.11                          | 25.15                  | 0.007809 | 1        |
| NM_001136195 | TNPO2     | -      | 5092              | 278                  | 1,133                          | 2.36                | 9.32                          | -3.95                  | 0.03545  | 1        |
| NM_001136543 | LYSMD1    | -      | 1840              | 16                   | 264                            | 0.39                | 6.00                          | -15.56                 | 0.016746 | 1        |
| NM_001141945 | ACTA2     | -      | 1758              | 5                    | 196                            | 0.11                | 4.68                          | -41.85                 | 0.011694 | 1        |
| NM_001142279 | RNASEH2B  | +      | 1669              | 3                    | 130                            | 0.08                | 3.27                          | -40.26                 | 0.036406 | 1        |
| NM_001142624 | RAB34     | -      | 1290              | 157                  | 6                              | 5.26                | 0.21                          | 25.23                  | 0.031307 | 1        |
| NM_001143676 | SGK1      | -      | 3201              | 596                  | 59                             | 8.05                | 0.77                          | 10.41                  | 0.004767 | 1        |
| NM_001143966 | TBC1D7    | -      | 1058              | 442                  | 48                             | 18.04               | 1.91                          | 9.44                   | 0.012623 | 1        |
| NM_001144030 | NAT10     | +      | 3826              | 0                    | 402                            | 0.00                | 4.40                          | -Inf                   | 3.55E-06 | 0.036042 |
| NM_001144928 | NKIRAS2   | +      | 2303              | 1                    | 104                            | 0.02                | 1.89                          | -102.18                | 0.039117 | 1        |
| NM_001145335 | UBE2Q2    | +      | 2979              | 4                    | 135                            | 0.05                | 1.90                          | -34.83                 | 0.040732 | 1        |
| NM_001145391 | OXSM      | +      | 1278              | 157                  | 9                              | 5.30                | 0.30                          | 17.41                  | 0.048856 | 1        |
| NM_001145646 | APH1B     | +      | 4070              | 22                   | 241                            | 0.24                | 2.48                          | -10.46                 | 0.040467 | 1        |
| NM_001146105 | PARP9     | -      | 3056              | 118                  | 1                              | 1.67                | 0.01                          | 111.44                 | 0.022141 | 1        |
| NM_001146258 | PIP4K2C   | +      | 2930              | 318                  | 42                             | 4.68                | 0.60                          | 7.78                   | 0.038488 | 1        |
| NM_001146260 | PIP4K2C   | +      | 3075              | 7                    | 194                            | 0.10                | 2.64                          | -25.16                 | 0.01861  | 1        |
| NM_001146314 | ABHD14B   | -      | 2243              | 107                  | 665                            | 2.07                | 12.43                         | -6.01                  | 0.019128 | 1        |
| NM_001160230 | ADARB1    | +      | 3468              | 120                  | 1                              | 1.49                | 0.01                          | 149.03                 | 0.020746 | 1        |
| NM_001161012 | ARMC10    | +      | 2347              | 99                   | 1                              | 1.82                | 0.03                          | 68.37                  | 0.041392 | 1        |
| NM_001161766 | AHCY      | -      | 2371              | 302                  | 34                             | 5.49                | 0.60                          | 9.11                   | 0.031484 | 1        |
| NM_001163436 | TBCK      | -      | 3362              | 12                   | 313                            | 0.16                | 3.90                          | -24.38                 | 0.004346 | 1        |
| NM_001163673 | WDR81     | +      | 3184              | 95                   | 1                              | 1.30                | 0.01                          | 161.78                 | 0.047298 | 1        |
| NM_001164342 | ZBTB20    | -      | 3311              | 189                  | 15                             | 2.47                | 0.19                          | 13.20                  | 0.048479 | 1        |
| NM_001164674 | SUMF1     | -      | 2086              | 2                    | 131                            | 0.04                | 2.63                          | -64.26                 | 0.025914 | 1        |
| NM_001164720 | CC2D2A    | +      | 1525              | 193                  | 0                              | 5.47                | 0.00                          | Inf                    | 0.000825 | 0.986307 |
| NM_001165937 | STARD3    | +      | 2834              | 295                  | 16                             | 4.49                | 0.24                          | 18.88                  | 0.008457 | 1        |
| NM_001165946 | IDE       | -      | 4480              | 1                    | 160                            | 0.01                | 1.49                          | -288.93                | 0.006836 | 1        |
| NM_001166057 | PEPD      | -      | 1818              | 58                   | 442                            | 1.39                | 10.18                         | -7.34                  | 0.023631 | 1        |

| Transcript   | Gene           | Strand | Transcript Length | SPRIGHTLY-EE (Reads) | Melanocyte Vector Only (Reads) | SPRIGHTLY-EE (RPKM) | Melanocyte Vector Only (RPKM) | SPRIGHTLY-EE/VO (RPKM) | p-value  | FDR      |
|--------------|----------------|--------|-------------------|----------------------|--------------------------------|---------------------|-------------------------------|------------------------|----------|----------|
| NM_001166292 | PTCH2          | -      | 4298              | 15,032               | 3,730                          | 151.07              | 36.36                         | 4.16                   | 0.008007 | 1        |
| NM_001166426 | WDR13          | +      | 2460              | 9                    | 222                            | 0.16                | 3.79                          | -24.04                 | 0.014626 | 1        |
| NM_001166599 | FAM122B        | -      | 4267              | 23                   | 247                            | 0.23                | 2.42                          | -10.42                 | 0.03967  | 1        |
| NM_001167672 | LPP            | +      | 17747             | 195                  | 1,238                          | 0.47                | 2.92                          | -6.17                  | 0.006536 | 1        |
| NM_001167930 | IL1RAP         | +      | 2007              | 151                  | 0                              | 3.24                | 0.00                          | Inf                    | 0.003339 | 1        |
| NM_001167941 | WDR76          | +      | 3917              | 102                  | 1                              | 1.13                | 0.01                          | 116.08                 | 0.037466 | 1        |
| NM_001172416 | KCNJ13         | -      | 3373              | 472                  | 60                             | 6.05                | 0.75                          | 8.06                   | 0.016106 | 1        |
| NM_001172417 | KCNJ13         | -      | 3376              | 34                   | 385                            | 0.43                | 4.78                          | -11.08                 | 0.013025 | 1        |
| NM_001172478 | RRM2B          | -      | 4776              | 57                   | 440                            | 0.51                | 3.86                          | -7.52                  | 0.023136 | 1        |
| NM_001172631 | TECPR2         | +      | 4397              | 506                  | 96                             | 4.97                | 0.92                          | 5.40                   | 0.038477 | 1        |
| NM_001174117 | DMXL2          | -      | 8688              | 14                   | 208                            | 0.07                | 1.00                          | -14.53                 | 0.03566  | 1        |
| NM_001177702 | IFT27          | -      | 684               | 107                  | 0                              | 6.78                | 0.00                          | Inf                    | 0.016119 | 1        |
| NM_001178040 | STX3           | +      | 6361              | 26                   | 257                            | 0.17                | 1.69                          | -9.70                  | 0.041808 | 1        |
| NM_001178046 | MX1            | +      | 2666              | 227                  | 0                              | 3.68                | 0.00                          | Inf                    | 0.000285 | 0.456779 |
| NM_001184701 | UGDH           | -      | 3026              | 305                  | 36                             | 4.35                | 0.50                          | 8.74                   | 0.033718 | 1        |
| NM_001184720 | GYG1           | +      | 1971              | 539                  | 66                             | 11.81               | 1.41                          | 8.39                   | 0.01101  | 1        |
| NM_001184783 | VDAC2          | +      | 1945              | 7                    | 158                            | 0.15                | 3.40                          | -23.19                 | 0.040847 | 1        |
| NM_001184823 | VDAC2          | +      | 1429              | 155                  | 5                              | 4.68                | 0.16                          | 29.88                  | 0.027082 | 1        |
| NM_001184892 | FLAD1          | +      | 1876              | 0                    | 95                             | 0.00                | 2.13                          | -Inf                   | 0.028282 | 1        |
| NM_001184898 | PHF8           | -      | 3562              | 104                  | 0                              | 1.26                | 0.00                          | Inf                    | 0.018023 | 1        |
| NM_001190329 | ATP5G3         | -      | 3293              | 7                    | 264                            | 0.09                | 3.35                          | -35.72                 | 0.004268 | 1        |
| NM_001190440 | NCOR1          | -      | 9286              | 73                   | 508                            | 0.34                | 2.29                          | -6.73                  | 0.022645 | 1        |
| NM_001190796 | NCK1           | +      | 1701              | 27                   | 272                            | 0.69                | 6.70                          | -9.73                  | 0.036074 | 1        |
| NM_001191002 | GSTO1          | +      | 905               | 570                  | 31                             | 27.20               | 1.45                          | 18.72                  | 0.000931 | 1        |
| NM_001191022 | CTCF           | +      | 2980              | 6                    | 163                            | 0.09                | 2.29                          | -26.25                 | 0.030904 | 1        |
| NM_001191036 | C8orf83        | -      | 3618              | 68                   | 448                            | 0.81                | 5.19                          | -6.43                  | 0.032345 | 1        |
| NM_001193513 | SLC30A6        | +      | 4965              | 578                  | 82                             | 5.02                | 0.69                          | 7.27                   | 0.014285 | 1        |
| NM_001193515 | SLC30A6        | +      | 4758              | 1                    | 134                            | 0.01                | 1.18                          | -163.76                | 0.015143 | 1        |
| NM_001198807 | C9orf30        | +      | 1879              | 1                    | 97                             | 0.01                | 2.17                          | -155.73                | 0.049032 | 1        |
| NM_001198846 | RBM14-RBM4     | +      | 923               | 0                    | 131                            | 0.00                | 5.94                          | -Inf                   | 0.007791 | 1        |
| NM_001199119 | TRIM39-RPP21   | +      | 1567              | 84                   | 0                              | 2.33                | 0.01                          | 351.70                 | 0.038506 | 1        |
| NM_001199196 | ARMC6          | +      | 2488              | 317                  | 43                             | 5.51                | 0.73                          | 7.55                   | 0.040743 | 1        |
| NM_001199535 | TGIF2-C20ORF24 | +      | 1090              | 344                  | 45                             | 13.61               | 1.72                          | 7.91                   | 0.032512 | 1        |
| NM_001199802 | RPL11          | +      | 631               | 772                  | 119                            | 52.83               | 7.89                          | 6.70                   | 0.010644 | 1        |
| NM_001201404 | WASF2          | -      | 5156              | 425                  | 53                             | 3.56                | 0.43                          | 8.23                   | 0.019143 | 1        |
| NM_001202485 | HSPE1-MOBKL3   | +      | 4279              | 196                  | 11                             | 1.98                | 0.11                          | 17.75                  | 0.028075 | 1        |
| NM_001204139 | MBD1           | -      | 3069              | 146                  | 3                              | 2.05                | 0.05                          | 43.38                  | 0.02081  | 1        |
| NM_001204255 | SCARB2         | -      | 4338              | 361                  | 1,395                          | 3.59                | 13.47                         | -3.75                  | 0.035287 | 1        |
| NM_001204298 | ZNF664         | +      | 4272              | 128                  | 666                            | 1.29                | 6.53                          | -5.06                  | 0.031569 | 1        |
| NM_001221    | CAMK2D         | -      | 5872              | 33                   | 331                            | 0.24                | 2.36                          | -9.77                  | 0.023883 | 1        |
| NM_001226    | CASP6          | -      | 1661              | 97                   | 1                              | 2.52                | 0.03                          | 72.31                  | 0.044244 | 1        |
| NM_001431    | EPB41L2        | -      | 4456              | 235                  | 24                             | 2.28                | 0.23                          | 9.99                   | 0.044461 | 1        |
| NM_001548    | IFIT1          | +      | 1860              | 286                  | 10                             | 6.64                | 0.23                          | 29.49                  | 0.004194 | 1        |
| NM_001786    | CDK1           | +      | 1913              | 429                  | 43                             | 9.69                | 0.95                          | 10.23                  | 0.011163 | 1        |
| NM_002038    | IFI6           | -      | 836               | 844                  | 88                             | 43.60               | 4.40                          | 9.91                   | 0.002381 | 1        |
| NM_002072    | GNAQ           | -      | 2196              | 191                  | 879                            | 3.76                | 16.77                         | -4.46                  | 0.03155  | 1        |
| NM_002130    | HMGCS1         | -      | 3451              | 460                  | 84                             | 5.76                | 1.02                          | 5.65                   | 0.040607 | 1        |
| NM_002371    | MAL            | +      | 1056              | 349                  | 1,316                          | 14.29               | 52.19                         | -3.65                  | 0.040284 | 1        |
| NM_002380    | MATN2          | +      | 4108              | 205                  | 11                             | 2.16                | 0.11                          | 19.48                  | 0.023506 | 1        |
| NM_002462    | MX1            | +      | 2966              | 448                  | 0                              | 6.52                | 0.00                          | Inf                    | 9.06E-07 | 0.013814 |
| NM_002480    | PPP1R12A       | -      | 5726              | 9                    | 188                            | 0.07                | 1.37                          | -19.53                 | 0.029014 | 1        |
| NM_002525    | NRD1           | -      | 4024              | 906                  | 180                            | 9.72                | 1.87                          | 5.19                   | 0.018811 | 1        |
| NM_002535    | OAS2           | +      | 3647              | 114                  | 0                              | 1.35                | 0.00                          | Inf                    | 0.012448 | 1        |
| NM_002836    | PTPRA          | +      | 3620              | 556                  | 63                             | 6.64                | 0.73                          | 9.11                   | 0.008298 | 1        |
| NM_003017    | SRSF3          | +      | 3144              | 411                  | 8                              | 5.65                | 0.10                          | 54.31                  | 0.000266 | 0.451157 |
| NM_003043    | SLC6A6         | +      | 6508              | 201                  | 1,033                          | 1.33                | 6.65                          | -4.99                  | 0.018047 | 1        |
| NM_003075    | SMARCC2        | -      | 5588              | 175                  | 762                            | 1.35                | 5.72                          | -4.23                  | 0.043966 | 1        |
| NM_003220    | TFAP2A         | -      | 3300              | 155                  | 781                            | 2.03                | 9.91                          | -4.89                  | 0.02781  | 1        |
| NM_003258    | TK1            | -      | 1595              | 278                  | 23                             | 7.53                | 0.60                          | 12.46                  | 0.021567 | 1        |
| NM_003495    | HIST1H4I       | +      | 370               | 473                  | 47                             | 55.22               | 5.32                          | 10.38                  | 0.0086   | 1        |
| NM_003511    | HIST1H2AL      | +      | 470               | 712                  | 21                             | 65.43               | 1.87                          | 34.96                  | 5.40E-05 | 0.182757 |
| NM_003514    | HIST1H2AM      | -      | 487               | 565                  | 82                             | 50.09               | 7.05                          | 7.10                   | 0.015891 | 1        |

| Transcript | Gene      | Strand | Transcript Length | SPRIGHTLY - EE (Reads) | Melanocyte Vector Only (Reads) | SPRIGHTLY - EE (RPKM) | Melanocyte Vector Only (RPKM) | SPRIGHTLY - EE/VO (RPKM) | p-value  | FDR      |
|------------|-----------|--------|-------------------|------------------------|--------------------------------|-----------------------|-------------------------------|--------------------------|----------|----------|
| NM_003518  | HIST1H2BG | -      | 445               | 1,100                  | 257                            | 106.77                | 24.19                         | 4.41                     | 0.025493 | 1        |
| NM_003521  | HIST1H2BM | +      | 446               | 385                    | 33                             | 37.29                 | 3.10                          | 12.03                    | 0.010186 | 1        |
| NM_003523  | HIST1H2BE | +      | 435               | 330                    | 26                             | 32.77                 | 2.50                          | 13.09                    | 0.012743 | 1        |
| NM_003524  | HIST1H2BH | +      | 425               | 748                    | 107                            | 76.02                 | 10.55                         | 7.21                     | 0.008895 | 1        |
| NM_003525  | HIST1H2BI | +      | 437               | 319                    | 9                              | 31.53                 | 0.86                          | 36.54                    | 0.001843 | 1        |
| NM_003527  | HIST1H2BO | +      | 467               | 465                    | 45                             | 43.01                 | 4.04                          | 10.65                    | 0.00839  | 1        |
| NM_003530  | HIST1H3D  | -      | 864               | 1,188                  | 159                            | 59.39                 | 7.69                          | 7.73                     | 0.002931 | 1        |
| NM_003531  | HIST1H3C  | +      | 459               | 1,321                  | 59                             | 124.31                | 5.38                          | 23.08                    | 2.02E-05 | 0.094778 |
| NM_003532  | HIST1H3E  | +      | 462               | 612                    | 127                            | 57.22                 | 11.52                         | 4.97                     | 0.036826 | 1        |
| NM_003533  | HIST1H3I  | -      | 477               | 558                    | 119                            | 50.53                 | 10.45                         | 4.83                     | 0.044868 | 1        |
| NM_003534  | HIST1H3G  | -      | 467               | 508                    | 3                              | 46.99                 | 0.27                          | 174.59                   | 5.68E-06 | 0.043291 |
| NM_003535  | HIST1H3J  | -      | 478               | 641                    | 51                             | 57.92                 | 4.47                          | 12.96                    | 0.00202  | 1        |
| NM_003536  | HIST1H3H  | +      | 473               | 981                    | 52                             | 89.58                 | 4.61                          | 19.45                    | 0.000121 | 0.308029 |
| NM_003537  | HIST1H3B  | -      | 472               | 2,065                  | 46                             | 188.97                | 4.08                          | 46.28                    | 1.14E-07 | 0.002312 |
| NM_003539  | HIST1H4D  | -      | 367               | 1,364                  | 292                            | 160.53                | 33.33                         | 4.82                     | 0.014721 | 1        |
| NM_003542  | HIST1H4C  | +      | 390               | 1,189                  | 322                            | 131.68                | 34.59                         | 3.81                     | 0.038896 | 1        |
| NM_003546  | HIST1H4L  | -      | 364               | 433                    | 34                             | 51.38                 | 3.91                          | 13.13                    | 0.006026 | 1        |
| NM_003634  | NIPSNAP1  | -      | 2236              | 423                    | 21                             | 8.18                  | 0.39                          | 21.00                    | 0.002116 | 1        |
| NM_003641  | IFITM1    | +      | 717               | 591                    | 22                             | 35.60                 | 1.29                          | 27.70                    | 0.000261 | 0.451157 |
| NM_003733  | OASL      | -      | 1820              | 80                     | 0                              | 1.90                  | 0.00                          | Inf                      | 0.044958 | 1        |
| NM_003991  | EDNRB     | -      | 2530              | 529                    | 1,805                          | 9.02                  | 29.89                         | -3.31                    | 0.045638 | 1        |
| NM_004111  | FEN1      | +      | 2249              | 462                    | 72                             | 8.87                  | 1.34                          | 6.62                     | 0.027663 | 1        |
| NM_004316  | ASCL1     | +      | 2484              | 0                      | 161                            | 0.00                  | 2.72                          | -Inf                     | 0.002817 | 1        |
| NM_004336  | BUB1      | -      | 3502              | 197                    | 17                             | 2.43                  | 0.20                          | 11.95                    | 0.049758 | 1        |
| NM_004390  | CTSH      | -      | 1485              | 880                    | 85                             | 25.60                 | 2.40                          | 10.67                    | 0.001637 | 1        |
| NM_004526  | MCM2      | +      | 3434              | 849                    | 170                            | 10.67                 | 2.07                          | 5.15                     | 0.021089 | 1        |
| NM_004587  | RRBP1     | -      | 3715              | 26                     | 248                            | 0.30                  | 2.80                          | -9.37                    | 0.047503 | 1        |
| NM_004736  | XPR1      | +      | 8496              | 21                     | 557                            | 0.10                  | 2.75                          | -26.35                   | 0.000451 | 0.654789 |
| NM_004899  | BRE       | +      | 1890              | 349                    | 45                             | 7.97                  | 0.99                          | 8.06                     | 0.030696 | 1        |
| NM_005030  | PLK1      | +      | 2169              | 214                    | 11                             | 4.26                  | 0.21                          | 20.26                    | 0.019698 | 1        |
| NM_005101  | ISG15     | +      | 666               | 234                    | 0                              | 15.18                 | 0.00                          | Inf                      | 0.00023  | 0.451157 |
| NM_005112  | WDR1      | -      | 2723              | 269                    | 1,087                          | 4.27                  | 16.72                         | -3.92                    | 0.03794  | 1        |
| NM_005120  | MED12     | +      | 6969              | 11                     | 221                            | 0.07                  | 1.33                          | -19.49                   | 0.019933 | 1        |
| NM_005319  | HIST1H1C  | -      | 732               | 1,448                  | 441                            | 85.44                 | 25.24                         | 3.39                     | 0.049655 | 1        |
| NM_005321  | HIST1H1E  | +      | 785               | 2,246                  | 478                            | 123.58                | 25.51                         | 4.84                     | 0.008766 | 1        |
| NM_005322  | HIST1H1B  | -      | 790               | 941                    | 18                             | 51.45                 | 0.95                          | 53.90                    | 2.75E-06 | 0.033594 |
| NM_005346  | HSPA1B    | +      | 2520              | 19                     | 220                            | 0.33                  | 3.66                          | -11.23                   | 0.044983 | 1        |
| NM_005505  | SCARB1    | -      | 2742              | 66                     | 461                            | 1.04                  | 7.04                          | -6.74                    | 0.026804 | 1        |
| NM_005692  | ABCF2     | -      | 2250              | 221                    | 7                              | 4.24                  | 0.12                          | 33.92                    | 0.008879 | 1        |
| NM_005733  | KIF20A    | +      | 3471              | 584                    | 57                             | 7.27                  | 0.69                          | 10.57                    | 0.004817 | 1        |
| NM_005773  | ZNF256    | -      | 2210              | 164                    | 9                              | 3.21                  | 0.17                          | 18.79                    | 0.042096 | 1        |
| NM_005798  | TRIM13    | +      | 6755              | 55                     | 381                            | 0.35                  | 2.36                          | -6.71                    | 0.038424 | 1        |
| NM_005891  | ACAT2     | +      | 1551              | 434                    | 74                             | 12.09                 | 1.99                          | 6.08                     | 0.03801  | 1        |
| NM_005915  | MCM6      | -      | 3751              | 921                    | 102                            | 10.61                 | 1.14                          | 9.31                     | 0.00241  | 1        |
| NM_005916  | MCM7      | -      | 2821              | 600                    | 132                            | 9.19                  | 1.97                          | 4.67                     | 0.044178 | 1        |
| NM_006036  | PREPL     | -      | 6890              | 6                      | 176                            | 0.04                  | 1.07                          | -29.92                   | 0.022992 | 1        |
| NM_006231  | POLE      | -      | 7840              | 564                    | 107                            | 3.11                  | 0.57                          | 5.43                     | 0.032659 | 1        |
| NM_006287  | TFPI      | -      | 3915              | 11                     | 201                            | 0.12                  | 2.15                          | -17.24                   | 0.029164 | 1        |
| NM_006624  | ZMYND11   | +      | 4317              | 51                     | 570                            | 0.51                  | 5.53                          | -10.94                   | 0.004941 | 1        |
| NM_006736  | DNAJB2    | +      | 3125              | 3                      | 158                            | 0.04                  | 2.12                          | -56.24                   | 0.017257 | 1        |
| NM_006739  | MCM5      | +      | 2546              | 400                    | 61                             | 6.79                  | 1.00                          | 6.76                     | 0.034    | 1        |
| NM_006820  | IFI44L    | +      | 5874              | 196                    | 13                             | 1.44                  | 0.09                          | 15.54                    | 0.035188 | 1        |
| NM_006845  | KIF2C     | +      | 2880              | 384                    | 30                             | 5.76                  | 0.44                          | 13.20                    | 0.008321 | 1        |
| NM_006903  | PPA2      | -      | 1586              | 282                    | 27                             | 7.68                  | 0.71                          | 10.84                    | 0.027103 | 1        |
| NM_006930  | SKP1      | -      | 2699              | 189                    | 5                              | 3.02                  | 0.07                          | 40.95                    | 0.011835 | 1        |
| NM_007008  | RTN4      | -      | 1779              | 601                    | 64                             | 14.60                 | 1.52                          | 9.62                     | 0.005785 | 1        |
| NM_007310  | COMT      | +      | 2035              | 5                      | 215                            | 0.10                  | 4.42                          | -45.35                   | 0.00755  | 1        |
| NM_007315  | STAT1     | -      | 4308              | 2,713                  | 878                            | 27.20                 | 8.54                          | 3.18                     | 0.043696 | 1        |
| NM_007323  | ZFYVE9    | +      | 2625              | 166                    | 0                              | 2.74                  | 0.01                          | 366.92                   | 0.002004 | 1        |
| NM_012081  | ELL2      | -      | 6046              | 9                      | 203                            | 0.06                  | 1.41                          | -21.88                   | 0.02141  | 1        |
| NM_012095  | AP3M1     | -      | 5127              | 46                     | 410                            | 0.39                  | 3.35                          | -8.61                    | 0.019222 | 1        |
| NM_012342  | BAMBI     | +      | 1724              | 978                    | 233                            | 24.50                 | 5.66                          | 4.33                     | 0.030924 | 1        |

| Transcript | Gene            | Strand | Transcript Length | SPRIGTLTY - EE (Reads) | Melanocyte Vector Only (Reads) | SPRIGTLTY - EE (RPKM) | Melanocyte Vector Only (RPKM) | SPRIGTLTY - EE/VO (RPKM) | p-value  | FDR      |
|------------|-----------------|--------|-------------------|------------------------|--------------------------------|-----------------------|-------------------------------|--------------------------|----------|----------|
| NM_013412  | RABL2A          | +      | 2170              | 0                      | 82                             | 0.00                  | 1.58                          | -Inf                     | 0.045919 | 1        |
| NM_013986  | EWSR1           | +      | 2678              | 329                    | 47                             | 5.31                  | 0.73                          | 7.29                     | 0.042086 | 1        |
| NM_014232  | VAMP2           | -      | 2155              | 183                    | 847                            | 3.67                  | 16.47                         | -4.49                    | 0.032412 | 1        |
| NM_014865  | NCAPD2          | +      | 4806              | 947                    | 259                            | 8.51                  | 2.26                          | 3.77                     | 0.04936  | 1        |
| NM_014945  | ABLIM3          | +      | 4335              | 6                      | 274                            | 0.06                  | 2.65                          | -44.29                   | 0.002712 | 1        |
| NM_014962  | BTBD3           | +      | 4857              | 752                    | 175                            | 6.69                  | 1.51                          | 4.42                     | 0.038918 | 1        |
| NM_015168  | ZC3H4           | -      | 6116              | 13                     | 220                            | 0.09                  | 1.51                          | -16.41                   | 0.025884 | 1        |
| NM_015243  | VPS13B          | +      | 2822              | 122                    | 0                              | 1.86                  | 0.00                          | Inf                      | 0.0093   | 1        |
| NM_015341  | NCAPH           | +      | 4495              | 349                    | 20                             | 3.35                  | 0.19                          | 17.99                    | 0.005593 | 1        |
| NM_015373  | CBY1            | +      | 1131              | 0                      | 86                             | 0.00                  | 3.18                          | -Inf                     | 0.039515 | 1        |
| NM_015513  | CRELD1          | +      | 2696              | 1                      | 206                            | 0.01                  | 3.20                          | -278.22                  | 0.001783 | 1        |
| NM_015516  | TSKU            | +      | 2710              | 23                     | 258                            | 0.37                  | 3.99                          | -10.88                   | 0.033701 | 1        |
| NM_015543  | RAB1A           | -      | 2415              | 46                     | 323                            | 0.83                  | 5.60                          | -6.74                    | 0.049807 | 1        |
| NM_015551  | SUSD5           | -      | 5005              | 135                    | 639                            | 1.17                  | 5.35                          | -4.59                    | 0.043228 | 1        |
| NM_015726  | DCAF8           | -      | 3883              | 502                    | 96                             | 5.58                  | 1.03                          | 5.42                     | 0.039705 | 1        |
| NM_015859  | GTF2A1          | -      | 1736              | 2                      | 134                            | 0.04                  | 3.23                          | -75.77                   | 0.023774 | 1        |
| NM_016014  | FAM108B1        | -      | 1613              | 144                    | 3                              | 3.84                  | 0.08                          | 45.44                    | 0.021984 | 1        |
| NM_016227  | C1orf9          | +      | 5466              | 213                    | 10                             | 1.68                  | 0.07                          | 22.49                    | 0.017516 | 1        |
| NM_016426  | GTSE1           | +      | 3112              | 234                    | 3                              | 3.25                  | 0.04                          | 80.42                    | 0.002065 | 1        |
| NM_016448  | DTL             | +      | 4412              | 357                    | 19                             | 3.50                  | 0.18                          | 19.37                    | 0.004437 | 1        |
| NM_016816  | OAS1            | +      | 1663              | 171                    | 2                              | 4.43                  | 0.05                          | 92.05                    | 0.007166 | 1        |
| NM_016817  | OAS2            | +      | 3539              | 260                    | 14                             | 3.17                  | 0.16                          | 19.78                    | 0.012191 | 1        |
| NM_017458  | MVP             | +      | 2925              | 55                     | 564                            | 0.81                  | 8.08                          | -9.92                    | 0.006464 | 1        |
| NM_017572  | MKMK2           | -      | 1758              | 228                    | 0                              | 5.59                  | 0.00                          | Inf                      | 0.000276 | 0.455062 |
| NM_017760  | NCAPG2          | -      | 3932              | 372                    | 49                             | 4.09                  | 0.52                          | 7.83                     | 0.028327 | 1        |
| NM_017867  | C4orf27         | -      | 1216              | 123                    | 4                              | 4.37                  | 0.14                          | 31.70                    | 0.049693 | 1        |
| NM_017912  | HERC6           | +      | 3889              | 279                    | 23                             | 3.10                  | 0.25                          | 12.31                    | 0.021244 | 1        |
| NM_017991  | KIAA1310        | -      | 5285              | 3                      | 169                            | 0.03                  | 1.34                          | -47.46                   | 0.012933 | 1        |
| NM_018030  | OSBPL1A         | -      | 3315              | 206                    | 16                             | 2.69                  | 0.21                          | 12.95                    | 0.039093 | 1        |
| NM_018045  | BSDC1           | -      | 2858              | 15                     | 210                            | 0.22                  | 3.08                          | -13.98                   | 0.037913 | 1        |
| NM_018101  | CDCA8           | +      | 2303              | 211                    | 11                             | 3.96                  | 0.20                          | 19.78                    | 0.020891 | 1        |
| NM_018248  | NEIL3           | +      | 2402              | 208                    | 4                              | 3.74                  | 0.07                          | 53.61                    | 0.00566  | 1        |
| NM_018304  | PRR11           | +      | 6473              | 334                    | 41                             | 2.23                  | 0.27                          | 8.40                     | 0.030317 | 1        |
| NM_018307  | RHOT1           | +      | 3089              | 8                      | 250                            | 0.12                  | 3.39                          | -28.76                   | 0.006998 | 1        |
| NM_018379  | FAM63A          | -      | 2840              | 2                      | 160                            | 0.03                  | 2.36                          | -83.16                   | 0.011383 | 1        |
| NM_018410  | HJURP           | -      | 3050              | 291                    | 20                             | 4.13                  | 0.27                          | 15.02                    | 0.013682 | 1        |
| NM_018446  | GLT8D1          | -      | 2095              | 2                      | 167                            | 0.04                  | 3.34                          | -90.88                   | 0.009366 | 1        |
| NM_018454  | NUSAP1          | +      | 2417              | 141                    | 1                              | 2.52                  | 0.01                          | 175.67                   | 0.010576 | 1        |
| NM_018492  | PBK             | -      | 1854              | 342                    | 24                             | 7.97                  | 0.54                          | 14.69                    | 0.009107 | 1        |
| NM_018672  | ABCA5           | -      | 9249              | 26                     | 261                            | 0.12                  | 1.18                          | -9.91                    | 0.039506 | 1        |
| NM_018717  | MAML3           | -      | 7088              | 27                     | 290                            | 0.16                  | 1.71                          | -10.42                   | 0.028114 | 1        |
| NM_020375  | C12orf5         | +      | 8225              | 298                    | 1,531                          | 1.56                  | 7.80                          | -4.98                    | 0.01122  | 1        |
| NM_020424  | LYRM1           | +      | 1560              | 132                    | 4                              | 3.66                  | 0.12                          | 30.91                    | 0.039216 | 1        |
| NM_020463  | SMEK2           | -      | 4203              | 305                    | 24                             | 3.13                  | 0.24                          | 13.06                    | 0.0156   | 1        |
| NM_020690  | ANKHD1-EIF4EBP3 | +      | 8349              | 0                      | 260                            | 0.00                  | 1.30                          | -Inf                     | 0.000136 | 0.318501 |
| NM_021018  | HIST1H3F        | -      | 466               | 1,122                  | 46                             | 104.00                | 4.14                          | 25.15                    | 2.57E-05 | 0.11192  |
| NM_021029  | RPL36A          | +      | 881               | 189                    | 13                             | 9.28                  | 0.64                          | 14.49                    | 0.040159 | 1        |
| NM_021052  | HIST1H2AE       | +      | 564               | 1,156                  | 231                            | 88.53                 | 17.16                         | 5.16                     | 0.013907 | 1        |
| NM_021058  | HIST1H2BJ       | -      | 481               | 676                    | 81                             | 60.67                 | 7.05                          | 8.60                     | 0.006288 | 1        |
| NM_021062  | HIST1H2BB       | -      | 431               | 376                    | 12                             | 37.68                 | 1.17                          | 32.31                    | 0.001199 | 1        |
| NM_021063  | HIST1H2BD       | +      | 523               | 812                    | 183                            | 67.05                 | 14.68                         | 4.57                     | 0.03225  | 1        |
| NM_021064  | HIST1H2AG       | +      | 498               | 1,289                  | 86                             | 111.80                | 7.23                          | 15.45                    | 0.000131 | 0.318501 |
| NM_021065  | HIST1H2AD       | -      | 460               | 304                    | 13                             | 28.55                 | 1.23                          | 23.27                    | 0.004896 | 1        |
| NM_021066  | HIST1H2AJ       | -      | 439               | 286                    | 19                             | 28.14                 | 1.81                          | 15.52                    | 0.013475 | 1        |
| NM_022098  | XPNPEP3         | +      | 8009              | 189                    | 852                            | 1.02                  | 4.45                          | -4.37                    | 0.034873 | 1        |
| NM_022166  | XYLT1           | -      | 9336              | 141                    | 763                            | 0.65                  | 3.42                          | -5.25                    | 0.023196 | 1        |
| NM_022872  | IFI6            | -      | 848               | 560                    | 67                             | 28.53                 | 3.31                          | 8.63                     | 0.0095   | 1        |
| NM_022873  | IFI6            | -      | 860               | 429                    | 51                             | 21.54                 | 2.50                          | 8.63                     | 0.016767 | 1        |
| NM_024540  | MRPL24          | -      | 886               | 0                      | 109                            | 0.00                  | 5.15                          | -Inf                     | 0.016974 | 1        |
| NM_024567  | HMBBOX1         | +      | 3233              | 231                    | 14                             | 3.08                  | 0.19                          | 16.57                    | 0.02052  | 1        |
| NM_025141  | TM2D3           | -      | 1329              | 7                      | 156                            | 0.22                  | 4.90                          | -22.06                   | 0.04269  | 1        |
| NM_025142  | TAOK1           | +      | 11637             | 64                     | 535                            | 0.24                  | 1.93                          | -8.14                    | 0.012725 | 1        |



| Transcript | Gene     | Strand   | Transcript Length | SPRIGHTLY - EE (Reads) | Melanocyte Vector Only (Reads) | SPRIGHTLY - EE (RPKM) | Melanocyte Vector Only (RPKM) | SPRIGHTLY - EE/VO (RPKM) | p-value  | FDR      |
|------------|----------|----------|-------------------|------------------------|--------------------------------|-----------------------|-------------------------------|--------------------------|----------|----------|
| NM_030800  | C15orf44 | -        | 2521              | 62                     | 390                            | 1.06                  | 6.48                          | -6.14                    | 0.045246 | 1        |
| NM_030931  | DEFB126  | +        | 413               | 49                     | 436                            | 5.12                  | 44.23                         | -8.63                    | 0.0169   | 1        |
| NM_031263  | HNRNPK   | -        | 2943              | 731                    | 74                             | 10.73                 | 1.05                          | 10.17                    | 0.00306  | 1        |
| NM_031966  | CCNB1    | +        | 2091              | 490                    | 43                             | 10.12                 | 0.86                          | 11.75                    | 0.005686 | 1        |
| NM_032172  | USP42    | +        | 5120              | 3                      | 133                            | 0.03                  | 1.09                          | -43.00                   | 0.033581 | 1        |
| NM_032750  | ABHD14B  | -        | 2437              | 898                    | 215                            | 15.91                 | 3.70                          | 4.30                     | 0.034527 | 1        |
| NM_032905  | RBM17    | +        | 3335              | 115                    | 1                              | 1.49                  | 0.01                          | 208.07                   | 0.024418 | 1        |
| NM_033177  | GPANK1   | -        | 2769              | 104                    | 1                              | 1.62                  | 0.01                          | 128.47                   | 0.035063 | 1        |
| NM_033301  | RPL8     | -        | 920               | 895                    | 212                            | 42.01                 | 9.65                          | 4.35                     | 0.033519 | 1        |
| NM_033420  | C19orf6  | -        | 2608              | 183                    | 4                              | 3.02                  | 0.07                          | 43.11                    | 0.010549 | 1        |
| NM_053067  | UBQLN1   | -        | 4084              | 108                    | 677                            | 1.15                  | 6.94                          | -6.05                    | 0.018107 | 1        |
| NM_053275  | RPLP0    | -        | 1264              | 1,024                  | 186                            | 34.98                 | 6.16                          | 5.68                     | 0.011678 | 1        |
| NM_054022  | GOSR2    | +        | 1469              | 172                    | 0                              | 5.06                  | 0.00                          | Inf                      | 0.00164  | 1        |
| NM_080668  | CDCA5    | -        | 2576              | 278                    | 30                             | 4.66                  | 0.49                          | 9.55                     | 0.034589 | 1        |
| NM_130798  | SNAP23   | +        | 2148              | 7                      | 238                            | 0.15                  | 4.64                          | -31.48                   | 0.007305 | 1        |
| NM_138287  | DTX3L    | +        | 5767              | 193                    | 15                             | 1.45                  | 0.11                          | 13.15                    | 0.045099 | 1        |
| NM_138569  | C6orf142 | +        | 1815              | 11                     | 291                            | 0.26                  | 6.72                          | -25.66                   | 0.005463 | 1        |
| NM_138570  | SLC38A10 | -        | 3062              | 48                     | 366                            | 0.67                  | 5.00                          | -7.43                    | 0.033841 | 1        |
| NM_138717  | PPT2     | +        | 1833              | 134                    | 932                            | 3.15                  | 21.30                         | -6.75                    | 0.007479 | 1        |
| NM_138740  | C1orf43  | -        | 1742              | 745                    | 168                            | 18.47                 | 4.05                          | 4.57                     | 0.03592  | 1        |
| NM_138761  | BAX      | +        | 810               | 212                    | 11                             | 11.28                 | 0.57                          | 19.89                    | 0.020486 | 1        |
| NM_138957  | MAPK1    | -        | 1497              | 202                    | 16                             | 5.84                  | 0.45                          | 12.92                    | 0.041947 | 1        |
| NM_139048  | HLTF     | -        | 4514              | 162                    | 10                             | 1.55                  | 0.09                          | 16.93                    | 0.04956  | 1        |
| NM_139207  | NAP1L1   | -        | 4451              | 434                    | 62                             | 4.21                  | 0.58                          | 7.21                     | 0.025239 | 1        |
| NM_139278  | LGI3     | -        | 3266              | 802                    | 5,442                          | 10.61                 | 69.80                         | -6.58                    | 0.00094  | 1        |
| NM_145655  | GCNT2    | +        | 4200              | 398                    | 1                              | 4.09                  | 0.01                          | 376.99                   | 1.08E-05 | 0.06182  |
| NM_145810  | CDCA7    | +        | 2573              | 391                    | 58                             | 6.57                  | 0.95                          | 6.94                     | 0.03333  | 1        |
| NM_147777  | SNX15    | +        | 1681              | 177                    | 4                              | 4.54                  | 0.11                          | 43.11                    | 0.012276 | 1        |
| NM_148172  | PEMT     | -        | 993               | 1                      | 98                             | 0.04                  | 4.14                          | -96.10                   | 0.04747  | 1        |
| NM_148887  | MRPL10   | -        | 1847              | 362                    | 54                             | 8.47                  | 1.23                          | 6.90                     | 0.038717 | 1        |
| NM_148918  | SHMT1    | -        | 2402              | 229                    | 10                             | 4.12                  | 0.17                          | 24.37                    | 0.01272  | 1        |
| NM_152231  | FBXO34   | +        | 2831              | 0                      | 128                            | 0.00                  | 1.89                          | -Inf                     | 0.008649 | 1        |
| NM_152238  | SNX7     | +        | 1612              | 117                    | 3                              | 3.15                  | 0.07                          | 43.21                    | 0.046507 | 1        |
| NM_152240  | ZMAT3    | -        | 9113              | 2,021                  | 6,256                          | 9.58                  | 28.76                         | -3.00                    | 0.041195 | 1        |
| NM_152695  | ZNF449   | +        | 4059              | 9                      | 178                            | 0.10                  | 1.84                          | -19.18                   | 0.035581 | 1        |
| NM_152850  | PIGO     | -        | 2465              | 35                     | 411                            | 0.61                  | 6.98                          | -11.51                   | 0.010177 | 1        |
| NM_153023  | SPATA13  | +        | 6693              | 3                      | 202                            | 0.02                  | 1.26                          | -69.85                   | 0.005542 | 1        |
| NM_153322  | PMP22    | -        | 1669              | 519                    | 2,253                          | 13.42                 | 56.56                         | -4.21                    | 0.015457 | 1        |
| NM_170695  | TGIF1    | +        | 2061              | 0                      | 80                             | 0.01                  | 1.63                          | -185.57                  | 0.049518 | 1        |
| NM_172211  | CSF1     | +        | 2079              | 80                     | 0                              | 1.66                  | 0.00                          | Inf                      | 0.044958 | 1        |
| NM_173217  | ST6GAL1  | +        | 3947              | 41                     | 335                            | 0.45                  | 3.56                          | -7.95                    | 0.034848 | 1        |
| NM_173607  | FAM177A1 | +        | 2926              | 68                     | 475                            | 1.00                  | 6.81                          | -6.81                    | 0.025374 | 1        |
| NM_175737  | KLB      | +        | 6079              | 172                    | 9                              | 1.22                  | 0.06                          | 19.70                    | 0.035528 | 1        |
| NM_175932  | PSMD13   | +        | 1763              | 221                    | 18                             | 5.40                  | 0.43                          | 12.67                    | 0.035836 | 1        |
| NM_176867  | PPA2     | -        | 1175              | 97                     | 0                              | 3.57                  | 0.00                          | Inf                      | 0.02344  | 1        |
| NM_176869  | PPA2     | -        | 1673              | 3                      | 169                            | 0.08                  | 4.23                          | -50.33                   | 0.012933 | 1        |
| NM_178001  | PPP2R4   | +        | 2846              | 588                    | 91                             | 8.93                  | 1.35                          | 6.63                     | 0.017605 | 1        |
| NM_178157  | FUT8     | +        | 1369              | 184                    | 11                             | 5.80                  | 0.34                          | 16.91                    | 0.035623 | 1        |
| NM_178234  | TUSC3    | +        | 3819              | 237                    | 20                             | 2.68                  | 0.22                          | 12.22                    | 0.032363 | 1        |
| NM_178584  |          | 10-Sep - | 3185              | 4                      | 140                            | 0.06                  | 1.84                          | -31.90                   | 0.035881 | 1        |
| NM_178818  | CMTM4    | -        | 3414              | 1                      | 149                            | 0.01                  | 1.83                          | -142.43                  | 0.00954  | 1        |
| NM_181504  | PIK3R1   | +        | 5647              | 340                    | 6                              | 2.60                  | 0.04                          | 63.49                    | 0.000566 | 0.766465 |
| NM_181578  | RFC5     | +        | 2468              | 222                    | 7                              | 3.89                  | 0.12                          | 32.79                    | 0.008688 | 1        |
| NM_181597  | UPP1     | +        | 1838              | 173                    | 9                              | 4.07                  | 0.20                          | 20.51                    | 0.034784 | 1        |
| NM_182763  | MCL1     | -        | 3837              | 43                     | 355                            | 0.48                  | 3.87                          | -8.00                    | 0.030485 | 1        |
| NM_182923  | KLC1     | +        | 2382              | 220                    | 5                              | 4.00                  | 0.09                          | 44.76                    | 0.005677 | 1        |
| NM_194282  | LIN54    | -        | 6127              | 5                      | 198                            | 0.04                  | 1.36                          | -36.02                   | 0.011164 | 1        |
| NM_198155  | C21orf33 | +        | 1574              | 311                    | 33                             | 8.54                  | 0.89                          | 9.59                     | 0.026447 | 1        |
| NM_198183  | UBE2L6   | -        | 1269              | 169                    | 11                             | 5.74                  | 0.38                          | 15.27                    | 0.048062 | 1        |
| NM_198218  | ING1     | +        | 2170              | 174                    | 12                             | 3.47                  | 0.23                          | 14.80                    | 0.048376 | 1        |
| NM_198427  | BCAN     | +        | 2858              | 380                    | 1,410                          | 5.74                  | 20.67                         | -3.60                    | 0.040288 | 1        |
| NM_198700  | CELF1    | -        | 4647              | 585                    | 60                             | 5.44                  | 0.54                          | 10.05                    | 0.005538 | 1        |

| Transcript | Gene           | Strand | Transcript Length | SPRIGTLY-EE (Reads) | Melanocyte Vector Only (Reads) | SPRIGTLY-EE (RPKM) | Melanocyte Vector Only (RPKM) | SPRIGTLY-EE/VO (RPKM) | p-value  | FDR      |
|------------|----------------|--------|-------------------|---------------------|--------------------------------|--------------------|-------------------------------|-----------------------|----------|----------|
| NM_198892  | BMP2K          | +      | 3806              | 34                  | 377                            | 0.39               | 4.14                          | -10.71                | 0.014357 | 1        |
| NM_199043  | C14orf102      | -      | 3465              | 224                 | 8                              | 2.79               | 0.09                          | 29.77                 | 0.010102 | 1        |
| NM_199189  | MATR3          | +      | 5604              | 448                 | 80                             | 3.45               | 0.60                          | 5.76                  | 0.040173 | 1        |
| NM_201627  | TRIM41         | +      | 2680              | 0                   | 98                             | 0.00               | 1.53                          | -Inf                  | 0.025326 | 1        |
| NM_203305  | FAM102A        | -      | 3643              | 15                  | 241                            | 0.18               | 2.77                          | -15.39                | 0.022212 | 1        |
| NM_203350  | ZRANB2         | -      | 3070              | 3                   | 138                            | 0.04               | 1.89                          | -42.97                | 0.029364 | 1        |
| NM_206855  | QKI            | +      | 16362             | 289                 | 1,212                          | 0.76               | 3.10                          | -4.07                 | 0.030168 | 1        |
| NM_206889  | DIP2A          | +      | 3045              | 201                 | 17                             | 2.86               | 0.23                          | 12.36                 | 0.046431 | 1        |
| NM_212474  | FN1            | -      | 7896              | 30                  | 432                            | 0.16               | 2.29                          | -14.03                | 0.005488 | 1        |
| NM_213651  | SLC25A24       | -      | 3325              | 11                  | 323                            | 0.14               | 4.07                          | -29.31                | 0.00309  | 1        |
| NR_002588  | SNORA4         | +      | 137               | 57,134              | 16,697                         | 18,013.00          | 5,105.72                      | 3.53                  | 0.016385 | 1        |
| NR_003013  | SCARNA16       | +      | 187               | 10,354              | 2,698                          | 2,391.58           | 604.42                        | 3.96                  | 0.010951 | 1        |
| NR_003272  | PSPC1          | -      | 1673              | 357                 | 0                              | 9.22               | 0.01                          | 949.80                | 7.81E-06 | 0.052903 |
| NR_003672  | SNHG7          | -      | 2159              | 144                 | 4                              | 2.87               | 0.07                          | 38.51                 | 0.02866  | 1        |
| NR_003934  | LOC729156      | -      | 2426              | 149                 | 4                              | 2.65               | 0.06                          | 40.89                 | 0.025169 | 1        |
| NR_023319  | ADPGK          | -      | 2273              | 2                   | 113                            | 0.04               | 2.08                          | -57.69                | 0.043672 | 1        |
| NR_024203  | ECD            | -      | 1826              | 288                 | 25                             | 6.81               | 0.58                          | 11.84                 | 0.021612 | 1        |
| NR_024534  | ALG3           | -      | 1496              | 38                  | 297                            | 1.11               | 8.31                          | -7.49                 | 0.047416 | 1        |
| NR_024543  | SNHG7          | -      | 853               | 0                   | 129                            | 0.02               | 6.34                          | -312.78               | 0.008353 | 1        |
| NR_024547  | TMEM11         | -      | 1688              | 315                 | 27                             | 8.06               | 0.68                          | 11.88                 | 0.016974 | 1        |
| NR_024565  | ZNF271         | +      | 5134              | 18                  | 229                            | 0.15               | 1.87                          | -12.50                | 0.035912 | 1        |
| NR_024600  | DIABLO         | -      | 2215              | 4                   | 149                            | 0.07               | 2.81                          | -39.57                | 0.028588 | 1        |
| NR_026593  | TMX2           | +      | 1792              | 463                 | 89                             | 11.16              | 2.09                          | 5.34                  | 0.045342 | 1        |
| NR_026712  | RPL13AP5       | +      | 658               | 5                   | 270                            | 0.30               | 17.22                         | -57.96                | 0.002218 | 1        |
| NR_026885  | LOC100270804   | +      | 2017              | 290                 | 27                             | 6.21               | 0.56                          | 11.07                 | 0.02418  | 1        |
| NR_026928  | CGO30          | -      | 4890              | 2                   | 118                            | 0.02               | 1.01                          | -57.22                | 0.037748 | 1        |
| NR_027299  | XPC            | -      | 3596              | 3                   | 121                            | 0.03               | 1.41                          | -44.72                | 0.046434 | 1        |
| NR_027855  | CLK1           | -      | 1842              | 212                 | 5                              | 4.97               | 0.12                          | 40.40                 | 0.006849 | 1        |
| NR_027862  | HAT1           | +      | 1594              | 157                 | 6                              | 4.26               | 0.16                          | 26.89                 | 0.031307 | 1        |
| NR_027867  | PDCD6IP        | +      | 5283              | 58                  | 493                            | 0.48               | 3.91                          | -8.22                 | 0.014505 | 1        |
| NR_033489  | ABHD16A        | -      | 1895              | 139                 | 0                              | 3.16               | 0.00                          | Inf                   | 0.005071 | 1        |
| NR_033870  | DKFZp686O1327  | +      | 4745              | 16                  | 246                            | 0.15               | 2.17                          | -14.91                | 0.022602 | 1        |
| NR_034059  | PSMD1          | +      | 3155              | 27                  | 272                            | 0.37               | 3.61                          | -9.81                 | 0.036074 | 1        |
| NR_036465  | TMEM126B       | +      | 911               | 0                   | 82                             | 0.00               | 3.79                          | -Inf                  | 0.045919 | 1        |
| NR_037577  | TMEM222        | +      | 1702              | 284                 | 15                             | 7.22               | 0.36                          | 20.00                 | 0.009047 | 1        |
| NR_037804  | NPHP3-ACAD11   | -      | 7788              | 373                 | 37                             | 2.07               | 0.20                          | 10.51                 | 0.015248 | 1        |
| NR_037909  | ARHGAP19-SLIT1 | -      | 1916              | 131                 | 0                              | 2.94               | 0.01                          | 446.78                | 0.006731 | 1        |
| NR_037921  | MAVS           | +      | 11598             | 125                 | 609                            | 0.46               | 2.20                          | -4.74                 | 0.042638 | 1        |
| NR_037951  | C1QTNF3-AMACR  | -      | 3612              | 0                   | 97                             | 0.01               | 1.13                          | -219.98               | 0.026274 | 1        |
| S75896     | S75896         | +      | 167               | 0                   | 278                            | 0.00               | 69.81                         | -Inf                  | 8.21E-05 | 0.250215 |
| S81524     | S81524         | -      | 41                | 0                   | 113                            | 0.05               | 115.63                        | -2191.28              | 0.014702 | 1        |
| U01925     | U01925         | -      | 348               | 194                 | 7                              | 24.08              | 0.84                          | 28.57                 | 0.016089 | 1        |
| U50531     | U50531         | -      | 4885              | 2                   | 118                            | 0.02               | 1.01                          | -57.22                | 0.037748 | 1        |
| U79272     | U79272         | +      | 1282              | 0                   | 102                            | 0.00               | 3.33                          | -Inf                  | 0.021878 | 1        |
| uc001hqe.1 | uc001hqe.1     | -      | 3331              | 246                 | 24                             | 3.19               | 0.30                          | 10.79                 | 0.037634 | 1        |
| uc001odz.1 | uc001odz.1     | +      | 1279              | 104                 | 549                            | 3.53               | 17.99                         | -5.10                 | 0.04004  | 1        |
| uc001pdy.1 | uc001pdy.1     | -      | 1015              | 2385                | 599                            | 101.48             | 24.74                         | 4.10                  | 0.016915 | 1        |
| uc001sln.1 | uc001sln.1     | +      | 4078              | 6                   | 276                            | 0.06               | 2.84                          | -44.78                | 0.002601 | 1        |
| uc002fcw.1 | uc002fcw.1     | -      | 2465              | 3                   | 206                            | 0.05               | 3.50                          | -66.60                | 0.005011 | 1        |
| uc002hil.1 | uc002hil.1     | +      | 3024              | 0                   | 134                            | 0.00               | 1.86                          | -Inf                  | 0.007021 | 1        |
| uc002jtl.1 | uc002jtl.1     | +      | 187               | 5176                | 1349                           | 1,195.62           | 302.21                        | 3.96                  | 0.013334 | 1        |
| uc002qwc.1 | uc002qwc.1     | -      | 1124              | 108                 | 0                              | 4.16               | 0.00                          | Inf                   | 0.015532 | 1        |
| uc002wlw.1 | uc002wlw.1     | +      | 2667              | 139                 | 4                              | 2.25               | 0.07                          | 33.35                 | 0.03265  | 1        |
| uc003goe.1 | uc003goe.1     | +      | 2843              | 2                   | 110                            | 0.03               | 1.62                          | -50.74                | 0.047677 | 1        |
| uc003mmk.1 | uc003mmk.1     | +      | 1809              | 288                 | 20                             | 6.88               | 0.46                          | 14.80                 | 0.014343 | 1        |
| uc003myw.1 | uc003myw.1     | +      | 1090              | 0                   | 175                            | 0.00               | 6.73                          | -Inf                  | 0.001782 | 1        |
| uc003ojk.1 | uc003ojk.1     | -      | 1470              | 2                   | 262                            | 0.05               | 7.48                          | -151.61               | 0.00077  | 0.938792 |
| uc003pyw.1 | uc003pyw.1     | -      | 2435              | 27                  | 258                            | 0.47               | 4.44                          | -9.38                 | 0.043846 | 1        |
| uc003uhq.1 | uc003uhq.1     | -      | 3218              | 2                   | 112                            | 0.03               | 1.45                          | -49.71                | 0.044967 | 1        |
| uc004cos.1 | uc004cos.1     | +      | 2509              | 1329210             | 347556                         | 22,882.90          | 5,803.16                      | 3.94                  | 0.008987 | 1        |
| X02491     | X02491         | +      | 349               | 143                 | 4                              | 17.68              | 0.50                          | 35.05                 | 0.029416 | 1        |
| X02875     | X02875         | +      | 685               | 137                 | 5                              | 8.62               | 0.29                          | 29.58                 | 0.042318 | 1        |
